# Supplementary material
Source: publisher figshare collection journal article supplement (https://plos.figshare.com/articles/dataset/_/1123628)

Main result:

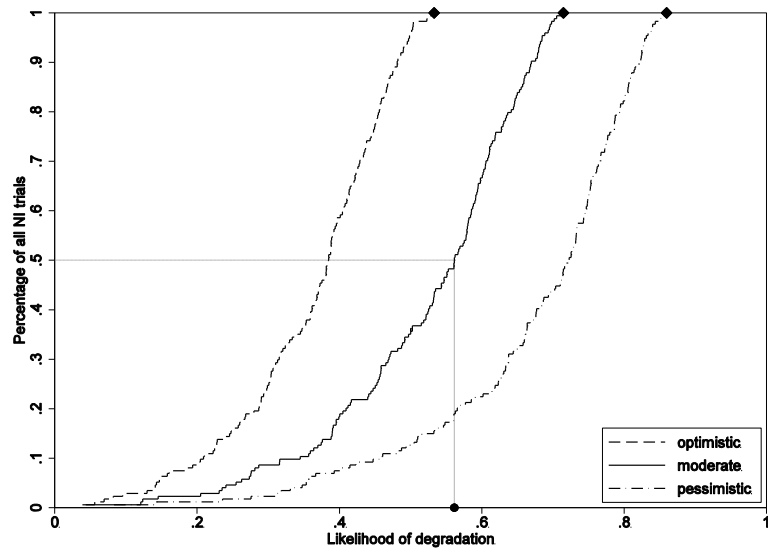

Sensitivity analysis - 1 ( $2/3^{\text{rd}}$  of the original mean and sd):

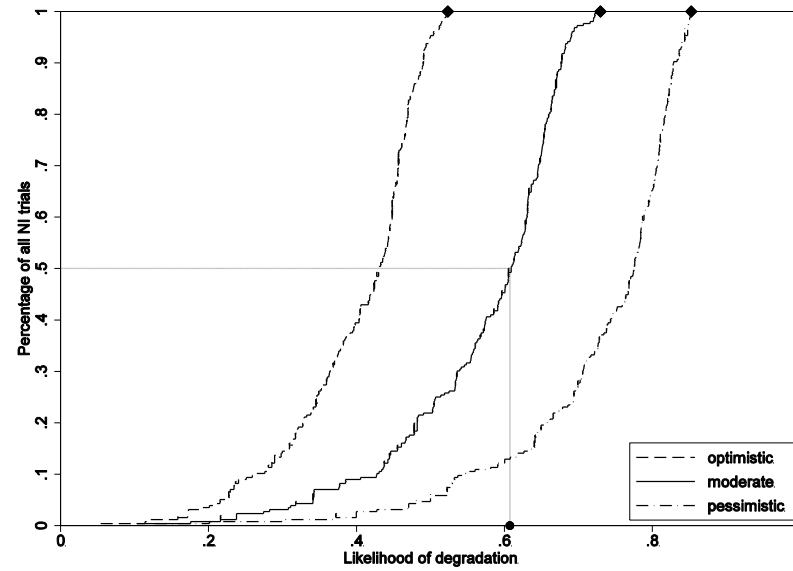

Sensitivity analysis - 2 (1.5 times the original mean and sd):

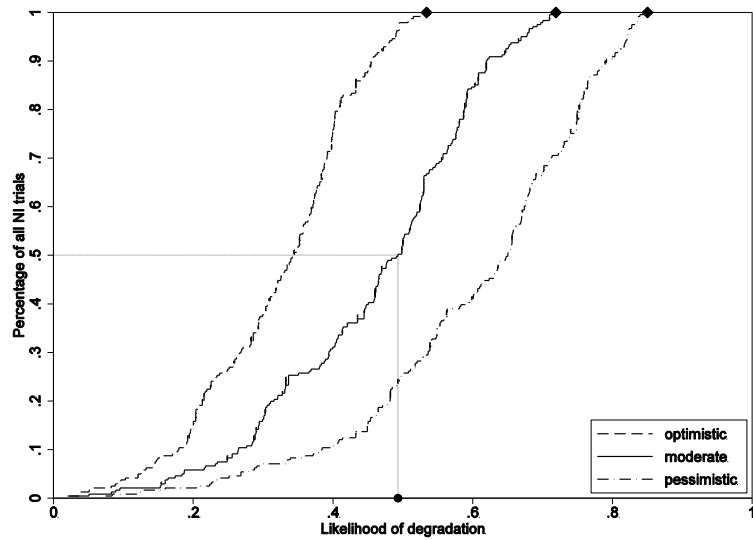

Supplement: Supplementary file 1 [file 1 › Figure_S1.pdf]
