# Supplementary material
Source: publisher figshare collection journal article supplement (https://plos.figshare.com/articles/dataset/_/1123628)
Supplement: Supplementary file 1 [file 1 › Table_S1.pdf]

Supplementary table 1a: Trial characteristics of the Non-inferiority trials registered either in clinicaltrials.gov / ISRCTN (2000 to 2007) contributing to our analyses (N-62):

| S.No. | Study id<br>(reference) | Trial register id | Health/Disease<br>condition studied in<br>the trial | Type of<br>drug/procedure/intervention         | Comparison between                                         | Primary outcome of non-<br>inferiority in the trial                        |
|-------|-------------------------|-------------------|-----------------------------------------------------|------------------------------------------------|------------------------------------------------------------|----------------------------------------------------------------------------|
| 1     | NI001(1)                | NCT01163812       | Gastric cancer                                      | Gastrectomy, surgical<br>procedure             | Less invasive Laproscopic New<br>vs Invasive Open Standard | Proportion of cases with no more<br>than one missing lymph node<br>station |
| 2     | NI004(2)                | NCT00142350       | Gastric cancer                                      | Anti tumour chemotherapy<br>agent              | Oral New vs Intravenous<br>Standard                        | One year overall survival                                                  |
| 3     | NI006(3)                | NCT00527137       | Anemia in chronic<br>kidney disease                 | Erythropoiesis stimulating<br>agent            | New vs Standard                                            | Change in serum Haemoglobin                                                |
| 4     | NI008(4)                | NCT00249223       | Schizophrenia                                       | Antipsychotic drug, route of<br>administration | Injection New vs Oral Standard                             | Change in Positive and Negative<br>syndrome scale (PANSS) score            |
| 5     | NI011(5)                | NCT00783744       | Diabetes                                            | Anti diabetic drug<br>combination              | New vs Standard                                            | Change in HbA1c                                                            |
| 6     | NI023(6)                | NCT00114608       | Venous<br>thromboembolism                           | Prophylactic procedure                         | New vs Standard                                            | Change in blood flow velocity                                              |
| 7     | NI024(7)                | NCT00398684       | HIV                                                 | Prophylactic drug                              | New vs Standard                                            | Rate of transmission from mother<br>to child                               |
| 8     | NI031(8)                | NCT00051753       | Otitis Media                                        | Antibiotic drug                                | New vs Standard                                            | Clinical cure rate                                                         |
| 9     | NI034(9)                | NCT00950794       | Asthma                                              | Anti asthmatic drug                            | New vs Standard                                            | Change in Peak Expiratory Flow                                             |

|    |             |             |                                     |                                   |                                                    |                                                 |
|----|-------------|-------------|-------------------------------------|-----------------------------------|----------------------------------------------------|-------------------------------------------------|
| 10 | NI038(10)   | NCT00751829 | hypertension                        | Anti hypertensive drug            | New vs Standard                                    | Change in systolic blood pressure               |
| 11 | NI039(11)   | NCT00253955 | Pneumonia                           | Antibiotic drug                   | New vs Standard                                    | Clinical cure rate                              |
| 12 | NI0310(12)  | NCT00383136 | Acute myocardial infarction         | Adjunctive therapy to angioplasty | New vs Standard                                    | Rate of complete ST resolution                  |
| 13 | NI0311(13)  | NCT00139815 | Acute coronary syndrome             | Anti coagulant drug               | Safer New vs Standard                              | Rate of composite of hazard events              |
| 14 | NI0313(14)  | NCT00274612 | hypertension                        | anti hypertensive drug            | New vs Standard                                    | Change in systolic and diastolic blood pressure |
| 15 | NI0315(15)  | NCT00208299 | Myocardial perfusion                | Diagnostic procedure              | Safer , Well tolerated New vs Standard             | Agreement rate                                  |
| 16 | NI0318(16)‡ | NCT00058682 | Candidemia                          | Antifungal drug                   | New vs Standard                                    | Clinical success rate                           |
| 17 | NI0320(17)  | NCT00106288 | Candidemia                          | Antifungal drug                   | Safer New vs Standard                              | Treatment success rate                          |
| 18 | NI0323(18)  | NCT00062803 | Venous thromboembolism              | Anti coagulant drug               | Fixed dose new vs Monitored dose adjusted Standard | Incidence rate                                  |
| 19 | NI0324(19)  | NCT00070655 | Stroke and Systemic thromboembolism | Anti coagulant drug               | Fixed dose new vs Monitored dose adjusted Standard | Cumulative Incidence                            |
| 20 | NI0325(20)  | NCT00334386 | hypertension                        | Anti hypertensive drug            | Prolonged release vs Immediate release             | Change in diastolic blood pressure              |
| 21 | NI115(21)   | NCT00150735 | Epilepsy                            | Treatment drug                    | Better tolerable New vs Standard                   | Seizure free rate                               |
| 22 | NI116(22)   | NCT00093067 | Bacteremia and endocarditis         | Antibiotic drug                   | New vs Standard                                    | Success rate                                    |

|    |            |             |                             |                                |                                                          |                                             |
|----|------------|-------------|-----------------------------|--------------------------------|----------------------------------------------------------|---------------------------------------------|
| 23 | NI117(23)  | NCT00439855 | Coronary artery disease     | Anticoagulant drug             | Safer, Convenient New vs Standard                        | Incidence of composite ischaemic endpoint   |
| 24 | NI1110(24) | NCT00118638 | Chemotherapy induced anemia | Treatment drug                 | Less frequent New vs Frequent standard treatment regimen | Incidence of blood transfusion              |
| 25 | NI1111(25) | NCT00206128 | Schizophrenia               | Treatment drug                 | Extended release vs Immediate release                    | Failure rate                                |
| 26 | NI1112(26) | NCT00254878 | Attention Deficit Disorder  | Treatment drug                 | Extended release vs Immediate release                    | Attention and deportment rating scale       |
| 27 | NI1113(27) | NCT00311961 | COPD exacerbation           | Treatment drug                 | Oral vs Intravenous                                      | Failure rate                                |
| 28 | NI1115(28) | NCT00093158 | Acute coronary syndrome     | Antithrombotic regimen         | Safer New vs Standard                                    | Incidence of composite ischaemic endpoint   |
| 29 | NI1118(29) | NCT00240474 | hypertension                | antihypertensive drug          | New vs Standard                                          | Change in systolic blood pressure           |
| 30 | NI1122(30) | NCT00682760 | Blepharospasm               | Treatment drug                 | New vs Standard                                          | Proportion of improvement in spasm severity |
| 31 | NI1126(31) | NCT00484900 | malaria                     | Anti malarial drug combination | Easy to use New vs Standard                              | Parasitological cure rate                   |
| 32 | NI127(32)  | NCT00299403 | Depression                  | Treatment procedure            | Safer New vs Standard                                    | Rate of partial remission                   |
| 33 | NI129(33)  | NCT00358176 | Postmenopausal osteoporosis | treatment drug                 | Less frequent New vs Frequent standard                   | Change in bone mineral density              |
| 34 | NI1211(34) | NCT00279344 | Cancer                      | Anti analgesic drug            | Well controlled New vs Standard                          | Change in pain intensity rating scale       |
| 35 | NI1219(35) | NCT00486694 | malaria                     | Anti malarial drug             | New vs Standard                                          | Parasitological cure rate                   |

|    |            |             |                                  |                       |                                                                    |                                                        |
|----|------------|-------------|----------------------------------|-----------------------|--------------------------------------------------------------------|--------------------------------------------------------|
| 36 | NI1222(36) | NCT00117169 | Pulmonary embolism               | Diagnostic procedure  | Single drug versus Combination                                     | 3 month thromboembolic risk                            |
| 37 | NI1223(37) | NCT00325637 | Ischemic stroke                  | antihypertensive drug | New vs Standard                                                    | Change in cerebral blood flow                          |
| 38 | NI1230(38) | NCT00150046 | cardiac<br>transplantation       | Immunosuppressant     | New vs Standard                                                    | Creatinine clearance rate                              |
| 39 | NI1235(39) | NCT00208312 | Myocardial perfusion             | Diagnostic procedure  | Safer Well tolerated New vs<br>Standard                            | Agreement rate                                         |
| 40 | NI1239(40) | NCT00158405 | HIV                              | Treatment strategies  | Non continuous New vs<br>Continuous standard treatment<br>strategy | Proportion of patients with CD4<br>count < 350 per mm3 |
| 41 | NI1240(41) | NCT00088491 | Schizophrenia                    | Treatment regimens    | Long acting injection vs Oral                                      | Exacerbation rate                                      |
| 42 | NI1246(42) | NCT00094523 | HIV                              | treatment regimens    | New vs Standard                                                    | Proportion of HIV RNA < 400<br>copies/ml               |
| 43 | NI1254(43) | NCT00298350 | HIV                              | Treatment drug        | New vs Standard                                                    | Change in HIV RNA level                                |
| 44 | NI1255(44) | NCT00375713 | Dermatitis & Eczema              | Anti allergic drug    | New vs Standard                                                    | Pruritis severity score                                |
| 45 | NI1256(45) | NCT00650598 | Knee arthroscopy<br>procedure    | Analgesic drug        | New vs Standard                                                    | VAS pain scale                                         |
| 46 | NI1259(46) | NCT01082471 | Abdominal surgery                | Anasthetic drug       | Well tolerated New vs Standard                                     | VRS-11 pain intensity score                            |
| 47 | NI1260(47) | NCT00299884 | Dyslipidemia                     | Treatment drug        | Well tolerated New vs Standard                                     | Change in LDL cholesterol                              |
| 48 | NI1263(48) | NCT00399464 | Benign prostatic<br>hyperplasia  | Treatment drug        | New vs Standard                                                    | Change in I-PSS score                                  |
| 49 | NI1265(49) | NCT00417872 | Clostridium difficile<br>Colitis | Antibiotic drug       | Less expensive New vs Standard                                     | Response rate                                          |

|    |             |                |                                       |                     |                                                               |                                         |
|----|-------------|----------------|---------------------------------------|---------------------|---------------------------------------------------------------|-----------------------------------------|
| 50 | NI1270(50)  | NCT00209300    | Ulcerative colitis                    | treatment drug      | Less frequent New vs Frequent standard                        | Remission rate                          |
| 51 | NI1278(51)  | NCT00140049    | Glaucoma                              | Anti glaucoma drug  | Less frequent New vs Frequent standard                        | Change in intra ocular pressure         |
| 52 | NI1301(52)  | ISRCTN65487167 | Osteoarthritis                        | Treatment procedure | More accessible treatment vs less accessible                  | Pain assessment visual score            |
| 53 | NI1302(53)  | ISRCTN51678883 | Esophagogastric cancer                | Treatment drug      | Convenient, less toxic drug vs Standard drug                  | Overall survival                        |
| 54 | NI1303(54)  | ISRCTN11611768 | Chronic Obstructive Pulmonary Disease | Treatment procedure | More tolerable New procedure vs less tolerable Standard       | Chronic respiratory questionnaire score |
| 55 | NI1305(55)  | ISRCTN81306618 | Malaria                               | Treatment drug      | Cheaper New vs Standard drug                                  | Cure rate                               |
| 56 | NI1312(56)  | ISRCTN62825862 | Acute MI                              | Treatment procedure | Safer New stent vs Standard stent                             | In-lesion late loss at 9 months         |
| 57 | NI1315(57)  | ISRCTN89458845 | Aortailiac occlusive disease          | Treatment procedure | New vs Standard                                               | Restenosis rate                         |
| 58 | NI1317(58)  | ISRCTN27914471 | Malaria                               | Treatment drug      | Cheap tolerable New vs Standard                               | Failure rate                            |
| 59 | NI1318(59)  | ISRCTN87811512 | Abortion                              | Treatment drug      | Safer New vs Standard                                         | Abortion rate                           |
| 60 | NI1319(60)  | ISRCTN89831716 | Fertilisation                         | Treatment procedure | Safer New vs Standard                                         | Fertilisation rate                      |
| 61 | NI1320(61)  | ISRCTN07576538 | Malaria                               | Treatment drug      | Easier to administer , fixed New vs Standard dosing procedure | Cure rate                               |
| 62 | NI1321(62)† | ISRCTN36773557 | Parturition                           | Treatment drug      | Cheaper, easy-to-store New vs Standard                        | Vaginal delivery in 24 hrs              |

‡ Trial registered by principal investigator as a non-inferiority trial but registered by sponsor with no reference to non-inferiority

† the two identical trials had a pooled analysis

Supplementary table 1b: Trial characteristics of the Non-inferiority trials published in the four major journals (2005 to 2011) contributing to our analyses (N-112):

| S.No. | Study id<br>(reference) | Health/Disease<br>condition studied in<br>the trial | Type of<br>drug/procedure/intervention | Comparison between                                    | Primary outcome of non-<br>inferiority in the trial |
|-------|-------------------------|-----------------------------------------------------|----------------------------------------|-------------------------------------------------------|-----------------------------------------------------|
| 1     | MJ001(63)               | Malaria                                             | Anti malarial drug, form of<br>tablet  | Easy to use New vs Standard                           | PCR corrected 28-day cure rate                      |
| 2     | MJ002(64)               | Diabetes                                            | Anti diabetic drug<br>combination      | Less frequent New vs Standard                         | Change in HbAc                                      |
| 3     | MJ003(65)               | Diabetes                                            | Anti diabetic drug                     | Less frequent New vs Standard                         | Change in HbAc                                      |
| 4     | MJ004(66)               | Stroke                                              | Anti coagulant drug                    | Fixed dose new vs Monitored dose adjusted<br>Standard | Incidence of stroke or embolism                     |
| 5     | MJ005(67)               | Colorectal surgery                                  | Surgical procedure                     | Better tolerable New vs Standard                      | Rate of leakage                                     |
| 6     | MJ007(68)               | Diabetes                                            | Anti diabetic drug                     | Less frequent New vs Standard                         | Change in HbAc                                      |
| 7     | MJ008(69)               | Thromboprophylaxis<br>- hip replacement             | Anti coagulant drug                    | Oral New vs Standard                                  | Rate of composite of<br>thromboembolism and death   |
| 8     | MJ009(70)               | HIV                                                 | Treatment drug                         | New vs Standard                                       | Proportion of RNA count <400/ml                     |
| 9     | MJ010(71)               | Head Injury                                         | Treatment procedure                    | Less time consuming New vs Standard                   | Rate of no recovery                                 |
| 10    | MJ011(72)               | Infertility                                         | Treatment procedure                    | Less expensive, More tolerable New vs Standard        | Proportion with Pregnancy at 1 yr                   |
| 11    | MJ012(73)               | Atrial fibrillation                                 | Treatment procedure                    | Better tolerable New vs Standard                      | Incidence of composite failure<br>endpoint          |

|    |           |                               |                                |                                               |                                                        |
|----|-----------|-------------------------------|--------------------------------|-----------------------------------------------|--------------------------------------------------------|
| 12 | MJ013(74) | Diabetes                      | Anti diabetic drug combination | Less adverse effect New vs Standard           | Incidence of composite failure endpoint                |
| 13 | MJ014(75) | Cancer                        | Treatment drug                 | Less toxic New vs Standard                    | Disease rate                                           |
| 14 | MJ015(76) | HIV                           | Treatment drug                 | New vs Standard                               | Proportion with RNA count <400/ml                      |
| 15 | MJ016(77) | Psoriasis                     | Treatment procedure            | Home based New vs Outpatient based Standard   | Success rate of high Psoriasis severity score          |
| 16 | MJ017(78) | Candidaemia                   | Treatment drug                 | New vs Standard                               | Proportion with Negative blood culture for candidaemia |
| 17 | MJ019(79) | HIV                           | Treatment drug combination     | Better tolerable New vs Standard              | Proportion with RNA count <50/ml                       |
| 18 | MJ020(80) | Obsessive compulsive disorder | Treatment procedure            | More accessible New vs Standard               | Change in score                                        |
| 19 | MJ021(81) | Anemia                        | Treatment drug                 | Less frequent, less monitored New vs Standard | Change in Hb in g/L                                    |
| 20 | MJ022(82) | HIV                           | Treatment drug combination     | New vs Standard                               | Proportion with RNA count <400/ml                      |
| 21 | MJ023(83) | Epilepsy                      | Treatment drug                 | New vs Standard                               | Retention rate                                         |
| 22 | MJ024(84) | Physiotherapy for Neck pain   | Treatment procedure            | Less time consuming New vs Standard           | Change in score                                        |
| 23 | MJ025(85) | antibiotic                    | Treatment procedure            | Easy, better tolerable New vs Standard        | Rate of renal scarring                                 |
| 24 | MJ026(86) | HIV                           | Treatment drug combination     | Less toxic New vs Standard                    | Proportion with RNA count <50/ml                       |
| 25 | MJ027(87) | Pneumonia                     | Treatment procedure            | Easy, better tolerable New vs Standard        | Clinical success rate                                  |
| 26 | MJ028(88) | Meningitis                    | Treatment drug                 | More accessible New vs Standard               | Failure rate                                           |
| 27 | MJ029(89) | Cancer                        | Treatment procedure            | Less adverse effect New vs Standard           | Relapse free rate                                      |
| 28 | MJ030(90) | Trypanosomiasis               | Treatment drug combination     | Less toxic, easy New vs Standard              | Cure rate                                              |
| 29 | MJ031(91) | Invasive Candidiasis          | Treatment drug                 | Safer New vs Standard                         | Proportion with negative blood                         |

|    |            |                                             |                            |                                              |                                                                 |
|----|------------|---------------------------------------------|----------------------------|----------------------------------------------|-----------------------------------------------------------------|
|    |            |                                             |                            |                                              | culture for candidaemia                                         |
| 30 | MJ032(92)  | Osteoporosis                                | Treatment drug             | Less frequent New vs Standard                | Percentage change in bone density                               |
| 31 | MJ034(93)  | Stroke                                      | Treatment drug             | Less adverse effect New vs Standard          | Recurrence rate                                                 |
| 32 | MJ035(94)  | Cancer                                      | Treatment drug combination | Lower cost, less toxic New vs Standard       | Survival                                                        |
| 33 | MJ036(95)  | Carotid artery stenosis                     | Treatment procedure        | New vs Standard                              | Incidence of Stroke or death                                    |
| 34 | MJ037(96)  | Malaria                                     | Anti malarial drug         | More accessible, less costly New vs Standard | Failure rate                                                    |
| 35 | MJ038(97)  | Coronary artery disease                     | Treatment procedure        | Safer New vs Standard                        | Incidence of composite failure endpoint                         |
| 36 | MJ039(98)  | Thromboprophylaxis - knee arthroplasty      | Anti coagulant drug        | Oral New vs Standard                         | Incidence of thrombosis or embolism or death                    |
| 37 | MJ042(99)  | Depression                                  | Treatment drug             | Better tolerable New vs Standard             | Change in depression score                                      |
| 38 | MJ043(100) | Contraception                               | Contraceptive drug         | Better tolerable New vs Standard             | 12 month severe flareup rate                                    |
| 39 | MJ044(101) | Renal transplant                            | Treatment drug             | Less adverse effect New vs Standard          | 6 month rejection rate                                          |
| 40 | MJ045(102) | Coronary heart disease                      | Treatment procedure        | New vs Standard                              | Insegment late luminal loss                                     |
| 41 | MJ046(103) | Colon cancer                                | Treatment drug             | Less adverse effect New vs Standard          | Disease free survival rate                                      |
| 42 | MJ047(104) | Thromboprophylaxis – total knee replacement | Anti coagulant drug        | Easy to use New vs Standard                  | Incidence of composite endpoint of thrombolism, embolism, death |
| 43 | MJ048(105) | Influenza                                   | Prophylactic procedure     | More accessible New vs Standard              | Incidence rate                                                  |
| 44 | MJ049(106) | Pulmonary adeno carcinoma                   | Treatment drug             | New vs Standard                              | 12 month progression free survival rate                         |
| 45 | MJ050(107) | Chronic hepatitis                           | Treatment drug             | New vs Standard                              | Therapeutic response rate                                       |
| 46 | MJ053(108) | Coronary artery                             | Treatment drug             | New vs Standard                              | Incidence of composite of major adverse cardiac/cerebrovascular |

|    |            | disease                           |                            |                                                     | events                                    |
|----|------------|-----------------------------------|----------------------------|-----------------------------------------------------|-------------------------------------------|
| 47 | MJ054(109) | Venous thrombo embolism (VTE)     | Treatment drug             | Less cost, easy to use New vs Standard              | Recurrence rate of venous thromboembolism |
| 48 | MJ055(110) | Pulmonary embolism                | Diagnostic procedure       | More informative New vs Standard                    | Incidence of thromboembolism              |
| 49 | MJ057(111) | Catheter related infection        | Treatment procedure        | Less cost, easy to use New vs Standard              | Catheter colonisation rate                |
| 50 | MJ058(112) | Lower respiratory tract infection | Treatment procedure        | Easy, less adverse effect New vs Standard           | Incidence of composite adverse outcomes   |
| 51 | MJ060(113) | Coronary artery disease - stent   | Treatment procedure        | New vs Standard                                     | In segment late loss                      |
| 52 | MJ061(114) | Heart failure                     | Treatment drug combination | Less adverse effect New vs Standard                 | Survival                                  |
| 53 | MJ062(115) | Acute myocardial infarction       | Treatment procedure        | Less adverse effect, less costly New vs Standard    | Recovery rate at 90 mts                   |
| 54 | MJ063(116) | Atrial fibrillation               | Anti coagulant drug        | Less adverse effect New vs Standard                 | Incidence of stroke or embolism           |
| 55 | MJ064(117) | Deep vein thrombosis (DVT)        | Treatment drug             | Less monitored New vs Standard                      | Recurrence rate                           |
| 56 | MJ065(118) | Parkinsons                        | Treatment drug             | New vs Standard                                     | Rate of change of score                   |
| 57 | MJ066(119) | Hepatoblastoma                    | Treatment drug             | Less toxic New vs Standard                          | Rate of resection                         |
| 58 | MJ067(120) | Acute VTE                         | Treatment drug             | Less monitored New vs Standard                      | 6 month recurrence rate                   |
| 59 | MJ068(121) | Intensive care unit (ICU)         | Treatment procedure        | Ease of use New vs Standard                         | Multiple organ dysfunction rate           |
| 60 | MJ069(122) | Lupus nephritis                   | Treatment drug             | Better tolerable, Oral New vs Standard              | Rate of remission                         |
| 61 | MJ072(123) | Carotid stenosis                  | Treatment procedure        | Less invasive New vs Std                            | Incidence of composite failure endpoint   |
| 62 | MJ074(124) | Leishmaniasis                     | Treatment drug             | Less expensive, less time consuming New vs Standard | Cure rate                                 |

|    |            |                                    |                            |                                                     |                                          |
|----|------------|------------------------------------|----------------------------|-----------------------------------------------------|------------------------------------------|
| 63 | MJ075(125) | Viral hepatitis                    | Treatment drug combination | Shorter duration New vs Standard                    | Virological response rate                |
| 64 | MJ076(126) | DVT                                | Treatment drug             | Less adverse effect New vs Standard                 | Recurrence rate                          |
| 65 | MJ078(127) | Prostate Cancer                    | Treatment procedure        | Less adverse effect New vs Standard                 | Survival                                 |
| 66 | MJ079(128) | breast cancer                      | Treatment drug combination | Easy to use New vs Standard                         | Recurrence rate                          |
| 67 | MJ081(129) | Percutaneous endoscopic gastrotomy | Treatment procedure        | Simpler New vs Standard                             | Rate of wound infection                  |
| 68 | MJ082(130) | Diabetes                           | Treatment drug combination | Less adverse effect New vs Standard                 | Change in HbA1c                          |
| 69 | MJ083(131) | Breast cancer                      | Treatment procedure        | Less adverse effect New vs Standard                 | Survival                                 |
| 70 | MJ084(132) | Septic shock                       | Treatment procedure        | Less cost, less time consuming New vs Standard      | In-Hospital mortality rate               |
| 71 | MJ085(133) | Hearing loss                       | Treatment procedure        | Less adverse effect New vs Standard                 | Change in hearing threshold              |
| 72 | MJ086(134) | Atrial fibrillation                | Anti coagulant drug        | Less monitored, less adverse effect New vs Standard | Incidence of cardiovascular major event  |
| 73 | MJ087(135) | Aortic valve replacement           | Treatment procedure        | Less invasive New vs Std                            | Survival                                 |
| 74 | MJ088(136) | Hepatitis                          | Treatment drug             | Shorter duration New vs Standard                    | Sustained virologic response rate        |
| 75 | MJ089(137) | Atrial fibrillation                | Anti coagulant drug        | Less adverse effect New vs Standard                 | Incidence of stroke or systemic embolism |
| 76 | MJ090(138) | Coronary artery disease            | Treatment procedure        | New vs Standard                                     | Cumulative event rate                    |
| 77 | MJ091(139) | Macular degeneration               | Treatment drug             | New vs Standard                                     | Change in visual acuity                  |
| 78 | MJ092(140) | Atrial fibrillation                | Anti coagulant drug        | Less monitored, less adverse effect New vs Standard | Ischemic/hemorrhagic event rate          |
| 79 | MJ094(141) | Ovarian cancer                     | Treatment procedure        | New vs Standard                                     | Survival                                 |
| 80 | MJ095(142) | Breast cancer                      | Treatment procedure        | Shorter duration New vs Standard                    | Risk of local breast cancer              |

|    |            |                                      |                            |                                         |                                                 |
|----|------------|--------------------------------------|----------------------------|-----------------------------------------|-------------------------------------------------|
|    |            |                                      |                            |                                         | recurrence                                      |
| 81 | MJ096(143) | Atrial fibrillation                  | Treatment procedure        | Less adverse effect New vs Standard     | Incidence of composite CV endpoint              |
| 82 | MJ098(144) | VTE                                  | Treatment drug             | Less monitored New vs Standard          | Recurrent rate of VTE                           |
| 83 | MJ099(145) | Latent TB infection                  | Treatment drug combination | Shorter duration New vs Standard        | Cumulative rate of TB confirmed                 |
| 84 | MJ100(146) | Visceral Leishmaniasis               | Treatment drug             | Less frequent New vs Standard           | Cure rate                                       |
| 85 | MJ101(147) | Coronary artery disease              | Treatment procedure        | New vs Standard                         | Incidence of composite CV endpoint              |
| 86 | MJ102(148) | ANCA vasculitis                      | Treatment drug             | Safer New vs Standard                   | Rate of remission of vasculitis                 |
| 87 | MJ103(149) | thromboprophylaxis - hip replacement | Anti coagulant drug        | Ease of use New vs Standard             | Incidence of composite CV endpoint              |
| 88 | MJ104(150) | Coronary artery stenosis             | Treatment procedure        | Safer New vs Standard                   | Incidence of composite CV endpoint              |
| 89 | MJ105(151) | Cardiac transplantation              | Treatment procedure        | Tolerable, Safer New vs Standard        | Cumulative rate of composite rejection endpoint |
| 90 | MJ106(152) | HIV                                  | Treatment drug             | Tolerable, Safer New vs Standard        | Confirmed response rate                         |
| 91 | MJ107(153) | Prostate cancer                      | Treatment drug             | Less toxic, easy New vs Standard        | Time to skeletal related event                  |
| 92 | MJ108(154) | Appendicitis                         | Treatment procedure        | Less invasive New vs Std                | Incidence of post intervention peritonitis      |
| 93 | MJ109(155) | Leishmaniasis                        | Treatment drug combination | Safer, shorter duration New vs Standard | Cure rate                                       |
| 94 | MJ112(156) | HIV                                  | Treatment drug             | Tolerable, Safer New vs Standard        | Confirmed response rate                         |
| 95 | MJ113(157) | H pylori eradication                 | Treatment drug combination | New vs Standard                         | Rate of H pylori eradication                    |
| 96 | MJ114(158) | Post partum Haemorrhage              | Treatment drug             | More accessible New vs Standard         | Cessation of active bleeding at 20 min          |

|     |            |                                       |                            |                                                                 |                                        |
|-----|------------|---------------------------------------|----------------------------|-----------------------------------------------------------------|----------------------------------------|
| 97  | MJ115(159) | Cerebral ischemia                     | Treatment drug             | Safer New vs Standard                                           | Incidence of composite CV endpoint     |
| 98  | MJ116(160) | Acute pulmonary embolism              | Treatment procedure        | Less cost, less time consuming New vs Standard                  | Incidence of symptomatic recurrent VTE |
| 99  | MJ117(161) | Breast cancer                         | Treatment procedure        | Safer, more tolerable New vs Std                                | 5 yr local recurrence rate             |
| 100 | MJ118(162) | Malaria                               | Treatment drug combination | Ease of use New vs Standard                                     | ACPR response rate                     |
| 101 | MJ120(163) | HIV                                   | Treatment procedure        | Easily accessible New vs Standard                               | Cumulative treatment failure rate      |
| 102 | MJ121(164) | Diabetes                              | Treatment procedure        | Safer, convenient New vs Standard                               | Change in HbAc                         |
| 103 | MJ122(165) | Diabetes                              | Treatment drug             | Better tolerable New vs Standard                                | Change in HbAc                         |
| 104 | MJ123(166) | Endometrial cancer                    | Treatment procedure        | Less adversr effects New vs Standard                            | 5 yr vaginal recurrence rate           |
| 105 | MJ124(167) | HIV                                   | Treatment procedure        | Easy, more accessible New vs Standard                           | Incidence of composite HIV endpoint    |
| 106 | MJ125(168) | Thromboprophylaxis - knee replacement | Anti coagulant drug        | Easy, less adverse effect New vs Standard                       | Incidence of composite CV endpoint     |
| 107 | MJ126(169) | Emergency contraception               | Treatment drug             | New vs Standard                                                 | Pregnancy rate                         |
| 108 | MJ127(170) | HIV                                   | Treatment drug combination | Less adverse effect New vs Standard                             | Response rate                          |
| 109 | MJ128(171) | ICU                                   | Treatment procedure        | Shorter duration, less adverse effect New vs Standard           | Mortality at day28                     |
| 110 | MJ129(172) | TB                                    | Treatment procedure        | Convenient, more compliant, less adverse effect New vs Standard | Cure rate                              |
| 111 | MJ131(173) | Post partum Haemorrhage               | Treatment drug             | More accessible New vs Standard                                 | Rate of bleeding cessation             |
| 112 | MJ132(174) | Syphilis                              | Treatment drug             | Convenient New vs Standard                                      | Cure rate                              |

## References:

1. Lee JH, Kim Y-W, Ryu KW, Lee JR, Kim CG, Choi IJ, et al. A phase-II clinical trial of laparoscopy-assisted distal gastrectomy with D2 lymph node dissection for gastric cancer patients. *Annals of Surgical Oncology*. 2007;14(11):3148–53.
2. Boku N, Yamamoto S, Fukuda H, Shirao K, Doi T, Sawaki A, et al. Fluorouracil versus combination of irinotecan plus cisplatin versus S-1 in metastatic gastric cancer: a randomised phase 3 study. *Lancet Oncol*. 2009;10:1063–9.
3. Warady BA, Arar MY, Lerner G, Nakanishi AM, Stehman-Breen C. Darbepoetin alfa for the treatment of anemia in pediatric patients with chronic kidney disease. *Pediatr Nephrol*. 2006;21:1144–52.
4. Chue P, Eerdekens M, Augustyns I, Lachaux B, Molcan P, Eriksson L, et al. Comparative efficacy and safety of long-acting risperidone and risperidone oral tablets. *European Neuropsychopharmacology*. 2005;15:111–7.
5. Janka HU, Kliebe-Frisch C, Plewe G, Schweitzer MA, Riddle MC, Yki-Jarvinen H. Comparison of basal insulin added to oral agents versus twice-daily premixed insulin as initial insulin therapy for type 2 diabetes. *DIABETES CARE*. 2005;28:254–9.
6. Czyrny JJ, Kaplan RE, Wilding GE, Purdy CH, Hirsh J. Electrical foot stimulation: a potential new method of deep venous thrombosis prophylaxis. *Vascular*. 18(1):20–7.
7. Lallemand M, Jourdain G, Le Coeur S, Mary JY, Ngo-Giang-Huong N, Koetsawang S, et al. Single-dose perinatal nevirapine plus standard zidovudine to prevent mother-to-child transmission of HIV-1 in Thailand. *New Engl J Med*. 2004;351:217–28.
8. Noel GJ, Blumer JL, Pichichero ME, Hedrick JA, Schwartz RH, Balis DA, et al. A randomized comparative study of levofloxacin versus amoxicillin/clavulanate for treatment of infants and young children with recurrent or persistent acute otitis media. *Pediatr Infect Dis J*. 2008;27(6):483–9.

9. GSK. CTR summary for MDC - 408DP-02 [Internet]. 2006. Available from: <http://download.gsk-clinicalstudyregister.com/files/3019.pdf>
10. Mallion J-M, Heagerty A, Laeis P. Systolic blood pressure reduction with olmesartan medoxomil versus nitrendipine in elderly patients with isolated systolic hypertension. *Journal of Hypertension*. 2007;25(10):2168–77.
11. Sanofi Aventis. Sanofi Aventis Company study document - HR355\_3035 [Internet]. 2008. Available from: [www.clinicalstudyresults.org/documents/company-study\\_4282\\_0.pdf](http://www.clinicalstudyresults.org/documents/company-study_4282_0.pdf)
12. Marzocchi A, Manari A, Piovaccari G, Marrozzini C, Marra S, Magnavacchi P, et al. Randomized comparison between tirofiban and abciximab to promote complete ST-resolution in primary angioplasty: results of the facilitated angioplasty with tirofiban or abciximab (FATA) in ST-elevation myocardial infarction trial. *European Heart Journal*. 2008;29(24):2972–80.
13. Yusuf S, Mehta SR, Chrolavicius S, Afzal R, Pogue J, Granger CB, et al. Comparison of fondaparinux and enoxaparin in acute coronary syndromes. *New Engl J Med*. 2006;354(14):1464–76.
14. Williams B, Gosse P, Lowe L, Harper R. The prospective, randomized investigation of the safety and efficacy of telmisartan versus ramipril using ambulatory blood pressure monitoring (PRISMA I). *Journal of Hypertension*. 2006;24(1):193–200.
15. Astellas Pharma US I. Lexiscan - efficacy and image agreement [Internet]. 2008. Available from: <http://www.lexiscan.com/about/extent.php>
16. Reboli AC, Rotstein C, Pappas PG, Chapman SW, Kett DH, Kumar D, et al. Anidulafungin versus fluconazole for invasive candidiasis. *New Engl J Med*. 2007;356:2472–82.
17. Kuse E-R, Chetchotisakd P, Da Cunha CA, Ruhnke M, Barrios C, Raghunadharao D, et al. Micafungin versus liposomal amphotericin B for candidaemia and invasive candidosis: a phase III randomised double-blind trial. *Lancet*. 2007;369(9572):1519–27.

18. Bousser MG, Bouthier J, Buller HR, Cohen AT, Crijns H, Davidson BL, et al. Comparison of idraparinux with vitamin K antagonists for prevention of thromboembolism in patients with atrial fibrillation: a randomised, open-label, non-inferiority trial. *Lancet*. 2008;371:315–21.
19. Buller HR, Cohen AT, Davidson B, Decousus H, Gallus AS, Gent M, et al. Idraparinux versus standard therapy for venous thromboembolic disease. *New Engl J Med*. 2007;357(11):1094–104.
20. Roca-Cusachs A, Aracil-Vilar J, Calvo-Gómez C, Vaquer-Pérez J-V, Laporta-Crespo F, Rojas-Serrano M-J, et al. Clinical effects of torasemide prolonged release in mild-to-moderate hypertension: a randomized noninferiority trial versus torasemide immediate release. *Cardiovascular Therapeutics*. 2008;26(2):91–100.
21. Brodie MJ, Perucca E, Ryvlin P, Ben-Menachem E, Meencke H-J. Comparison of levetiracetam and controlled-release carbamazepine in newly diagnosed epilepsy. *Neurology*. 2007;68:402–8.
22. Fowler VG, Boucher HW, Corey GR, Abrutyn E, Karchmer AW, Rupp ME, et al. Daptomycin versus standard therapy for bacteremia and endocarditis caused by *Staphylococcus aureus*. *New Engl J Med*. 2006;355:653–65.
23. Bertel O, Ramsay D, Wettstein T, Kurz DJ, Stettler I, Straumann E, et al. Intravenous enoxaparin versus unfractionated heparin in unselected patients undergoing percutaneous coronary interventions: the Zurich enoxaparin versus unfractionated heparin in PCI study (ZEUS). *EuroIntervention*. 2010;6(3):407–12.
24. Canon JL, Vansteenkiste J, Bodoky G, Mateos MV, Bastit L, Ferreira J, et al. Randomized, double-blind, active-controlled trial of every-3-week darbepoetin alfa for the treatment of chemotherapy-induced anemia. *Journal of the National Cancer Institute*. 2006;98:273–84.
25. Moeller H-J, Johnson S, Mateva T, Brecher M, Svensson O, Miller F, et al. Evaluation of the feasibility of switching from immediate release quetiapine to extended release quetiapine fumarate in stable outpatients with schizophrenia. *International Clinical Psychopharmacology*. 2008;23:95–105.

26. Novartis. Clinical trial results database - CTRD\_CRIT124DDE01\_Jan1607 [Internet]. 2007. Available from: [www.novartisclinicaltrials.com/webapp/.../displayFile.do?trialResult=2289](http://www.novartisclinicaltrials.com/webapp/.../displayFile.do?trialResult=2289)
27. Jong YP, Uil SM, Grotjohan HP, Postma DS, Kerstjens HAM, Van den Berg JWK. Oral or IV prednisolone in the treatment of COPD exacerbations - A randomized, controlled, double-blind study. *Chest*. 2007;132:1741–7.
28. Stone GW, McLaurin BT, Cox DA, Bertrand ME, Lincoff AM, Moses JW, et al. Bivalirudin for patients with acute coronary syndromes. *New Engl J Med*. 2006;355:2203–16.
29. Boehringer Ingelheim International GmbH. Boehringer Ingelheim Trial Synopsis 502.400 [Internet]. 2004. Available from: [http://trials.boehringer-ingelheim.com/res/trial/data/pdf/502.400\\_U04-2006\\_new.pdf](http://trials.boehringer-ingelheim.com/res/trial/data/pdf/502.400_U04-2006_new.pdf)
30. Yoon JS, Kim JC, Lee SY. Double-blind, randomized, comparative study of Meditoxin versus Botox in the treatment of essential blepharospasm. *Korean J Ophthalmol*. 2009;23(3):137–41.
31. Sagara I, Rulisa S, Mbacham W, Adam I, Sissoko K, Maiga H, et al. Efficacy and safety of a fixed dose artesunate-sulphamethoxypyrazine-pyrimethamine compared to artemether-lumefantrine for the treatment of uncomplicated falciparum malaria across Africa: a randomized multi-centre trial. *Malaria J*. 2009;8:-.
32. Hansen PEB, Ravnkilde B, Videbech P, Clemmensen K, Sturlason R, Reiner M, et al. Low-frequency repetitive transcranial magnetic stimulation inferior to electroconvulsive therapy in treating depression. *J ECT*. 2011;27(1):26–32.
33. Delmas PD, McClung MR, Zanchetta JR, Racewicz A, Roux C, Benhamou C-L, et al. Efficacy and safety of risedronate 150 mg once a month in the treatment of postmenopausal osteoporosis. *Bone*. 2008;42(1):36–42.
34. Kress HG, Laage D, Hoerauf KH, Nolte T, Heiskanen T, Peterson R, et al. A randomized, open, parallel group, multicenter trial to investigate analgesic efficacy and safety of a new transdermal fentanyl patch

compared to standard opioid treatment in cancer pain. *Journal of Pain and Symptom Management*.

2008;36:268–79.

35. Kolaczinski K, Durrani N, Rahim S, Rowland M. Sulfadoxine-pyrimethamine plus artesunate compared with chloroquine for the treatment of vivax malaria in areas co-endemic for *Plasmodium falciparum* and *P. vivax*: a randomised non-inferiority trial in eastern Afghanistan. *T Roy Soc Trop Med H*. 2007;101(11):1081–7.
36. Righini M, Le Gal G, Aujesky D, Roy P-M, Sanchez O, Verschuren F, et al. Diagnosis of pulmonary embolism by multidetector CT alone or combined with venous ultrasonography of the leg: a randomised non-inferiority trial. *Lancet*. 2008;371:1343–52.
37. Hong K-S, Kang D-W, Bae H-J, Kim YK, Han M-K, Park J-M, et al. Effect of cilnidipine vs losartan on cerebral blood flow in hypertensive patients with a history of ischemic stroke: a randomized controlled trial. *Acta Beurologica Scandinavica*. 2010;121:51–7.
38. Viganò M, Dengler T, Mattei MF, Poncelet A, Vanhaecke J, Vermes E, et al. Lower incidence of cytomegalovirus infection with everolimus versus mycophenolate mofetil in de novo cardiac transplant recipients: a randomized, multicenter study. *Transplant Infect Dis*. 2010;12(1):23–30.
39. Iskandrian AE, Bateman TM, Belardinelli L, Blackburn B, Cerqueira MD, Hendel RC, et al. Adenosine versus regadenoson comparative evaluation in myocardial perfusion imaging: results of the ADVANCE phase 3 multicenter international trial. *Journal of Nuclear Cardiology*. 14(5):645–58.
40. Danel C, Moh R, Chaix M-L, Gabillard D, Gnokoro J, Diby C-J, et al. Two-months-off, four-months-on antiretroviral regimen increases the risk of resistance, compared with continuous therapy: a randomized trial involving West African adults. *J Infect Dis*. 2009;199(1):66–76.

41. Kane JM, Detke HC, Naber D, Sethuraman G, Lin DY, Bergstrom RF, et al. Olanzapine Long-Acting Injection: A 24-Week, Randomized, Double-Blind Trial of Maintenance Treatment in Patients With Schizophrenia. *American Journal of Psychiatry*. 2010;167:181–9.
42. GSK. CTR Summary for MDC - ESS100290 [Internet]. 2007. Available from: <http://download.gsk-clinicalstudyregister.com/files/19896.pdf>
43. Zolopa AR, Berger DS, Lampiris H, Zhong L, Chuck SL, Enejosa JV, et al. Activity of Elvitegravir, a Once-Daily Integrase Inhibitor, against Resistant HIV Type 1: Results of a Phase 2, Randomized, Controlled, Dose-Ranging Clinical Trial. *Journal of Infectious Diseases*. 2010;201:814–22.
44. UCB I. Randomized Phase III Study to Evaluate the Efficacy and Safety of Xyzal® (Levocetirizine) vs Zyrtec® (Cetirizine) in Subjects With Dermatitis and Eczema - study results [Internet]. 2009. Available from: <http://clinicaltrials.gov/ct2/show/results/NCT00375713>
45. Pfizer INC. PHRMA web synopsis Valdecixib A3471039 [Internet]. 2005. Available from: [www.clinicalstudyresults.org/documents/company-study\\_746\\_0.pdf](http://www.clinicalstudyresults.org/documents/company-study_746_0.pdf)
46. Binning AR, Przesmycki K, Sowinski P, Morrison LMM, Smith TW, Marcus P, et al. A randomised controlled trial on the efficacy and side-effect profile (nausea/vomiting/sedation) of morphine-6-glucuronide versus morphine for post-operative pain relief after major abdominal surgery. *Eur J Pain*. 2011;15(4):402–8.
47. Kumar SS, Lahey KA, Day A, LaHaye SA. Comparison of the efficacy of administering a combination of ezetimibe plus fenofibrate versus atorvastatin monotherapy in the treatment of dyslipidemia. *Lipids Health Dis*. 2009;8:56.
48. Sanofi Aventis. Sanofi Aventis Company study document - EFC5791 [Internet]. 2008. Available from: [http://www.clinicalstudyresults.org/documents/company-study\\_7515\\_0.pdf](http://www.clinicalstudyresults.org/documents/company-study_7515_0.pdf)

49. Musher DM, Logan N, Hamill RJ, DuPont HL, Lentnek A, Gupta A, et al. Nitazoxanide for the treatment of *Clostridium difficile* colitis. *Clinical Infectious Diseases*. 2006;43:421–7.
50. Dignass AU, Bokemeyer B, Adamek H, Mross M, Vinter-Jensen L, Boerner N, et al. Mesalamine Once Daily Is More Effective Than Twice Daily in Patients With Quiescent Ulcerative Colitis. *Clinical Gastroenterology and Hepatology*. 2009;7:762–9.
51. Pfizer INC. PhRMA Clinical Study Synopsis Protocol A6641038 [Internet]. 2007. Available from: [http://www.clinicalstudyresults.org/documents/company-study\\_2989\\_0.pdf](http://www.clinicalstudyresults.org/documents/company-study_2989_0.pdf)
52. Hill J, Lewis M, Bird H. Do OA patients gain additional benefit from care from a clinical nurse specialist?-- a randomized clinical trial. *Rheumatology (Oxford, England)*. 2009 Jun;48:658–64.
53. Cunningham D, Starling N, Rao S, Iveson T, Nicolson M, Coxon F, et al. Capecitabine and oxaliplatin for advanced esophagogastric cancer. *The New England journal of medicine*. 2008 Jan 3;358:36–46.
54. Puhan MA, Busching G, Schunemann HJ, VanOort E, Zaugg C, Frey M. Interval versus continuous high-intensity exercise in chronic obstructive pulmonary disease: a randomized trial. *Annals of internal medicine*. 2006 Dec 5;145:816–25.
55. Valecha N, Phyo AP, Mayxay M, Newton PN, Krudsood S, Keomany S, et al. An open-label, randomised study of dihydroartemisinin-piperaquine versus artesunate-mefloquine for falciparum malaria in Asia. *PloS one*. 2010;5:e11880.
56. Van der Hoeven BL, Liem SS, Dijkstra J, Bergheanu SC, Putter H, Antoni ML, et al. Stent malapposition after sirolimus-eluting and bare-metal stent implantation in patients with ST-segment elevation myocardial infarction: acute and 9-month intravascular ultrasound results of the MISSION! intervention study. *JACC. Cardiovascular interventions*. 2008 Apr;1:192–201.

57. Mwipatayi BP, Thomas S, Wong J, Temple SEL, Vijayan V, Jackson M, et al. A comparison of covered vs bare expandable stents for the treatment of aortoiliac occlusive disease. *Journal of Vascular Surgery*. 2011;54:1561–1570.e1.
58. Smithuis F, Kyaw MK, Phe O, Aye KZ, Htet L, Barends M, et al. Efficacy and effectiveness of dihydroartemisinin-piperaquine versus artesunate-mefloquine in falciparum malaria: an open-label randomised comparison. *Lancet*. 2006 Jun 24;367:2075–85.
59. Von Hertzen H, Huong NT, Piaggio G, Bayalag M, Cabezas E, Fang AH, et al. Misoprostol dose and route after mifepristone for early medical abortion: a randomised controlled noninferiority trial. *BJOG : an international journal of obstetrics and gynaecology*. 2010 Sep;117:1186–96.
60. De Vos A, Van Landuyt L, Van Ranst H, Vandermonde A, D’Haese V, Sterckx J, et al. Randomized sibling-oocyte study using recombinant human hyaluronidase versus bovine-derived Sigma hyaluronidase in ICSI patients. *Human reproduction (Oxford, England)*. 2008 Aug;23:1815–9.
61. Sirima SB, Tiono AB, Gansane A, Diarra A, Ouedraogo A, Konate AT, et al. The efficacy and safety of a new fixed-dose combination of amodiaquine and artesunate in young African children with acute uncomplicated *Plasmodium falciparum*. *Malaria journal*. 2009;8:48.
62. Calder AA, Loughney AD, Weir CJ, Barber JW. Induction of labour in nulliparous and multiparous women: a UK, multicentre, open-label study of intravaginal misoprostol in comparison with dinoprostone. *BJOG : an international journal of obstetrics and gynaecology*. 2008 Sep;115:1279–88.
63. Abdulla S, Sagara I, Borrmann S, D’Alessandro U, Gonzalez R, Hamel M, et al. Efficacy and safety of artemether-lumefantrine dispersible tablets compared with crushed commercial tablets in African infants and children with uncomplicated malaria: a randomised, single-blind, multicentre trial. *Lancet*. 2008;372(9652):1819–27.

64. Bretzel RG, Nuber U, Landgraf W, Owens DR, Bradley C, Linn T. Once-daily basal insulin glargine versus thrice-daily prandial insulin lispro in people with type 2 diabetes on oral hypoglycaemic agents (APOLLO): an open randomised controlled trial. *Lancet*. 2008;371(9618):1073–84.
65. Buse JB, Rosenstock J, Sesti G, Schmidt WE, Montanya E, Brett JH, et al. Liraglutide once a day versus exenatide twice a day for type 2 diabetes: a 26-week randomised, parallel-group, multinational, open-label trial (LEAD-6). *Lancet*. 2009;374(9683):39–47.
66. Connolly SJ, Ezekowitz MD, Yusuf S, Eikelboom J, Oldgren J, Parekh A, et al. Dabigatran versus Warfarin in Patients with Atrial Fibrillation. *New Eng J Med*. 2009;361(12):1139–51.
67. Contant CME, Hop WCJ, Van 't Sant HP, Oostvogel HJM, Smeets HJ, Stassen LPS, et al. Mechanical bowel preparation for elective colorectal surgery: a multicentre randomised trial. *Lancet*. 2007;370(9605):2112–7.
68. Drucker DJ, Buse JB, Taylor K, Kendall DM, Trautmann M, Zhuang D, et al. Exenatide once weekly versus twice daily for the treatment of type 2 diabetes: a randomised, open-label, non-inferiority study. *Lancet*. 2008;372(9645):1240–50.
69. Eriksson BI, Dahl OE, Rosencher N, Kurth AA, Van Dijk CN, Frostick SP, et al. Dabigatran etexilate versus enoxaparin for prevention of venous thromboembolism after total hip replacement: a randomised, double-blind, non-inferiority trial. *Lancet*. 2007;370(9591):949–56.
70. Gallant JE, DeJesus E, Arribas, Pozniak AL, Gazzard B, Campo RE, et al. Tenofovir DF, emtricitabine, and efavirenz vs. zidovudine, lamivudine, and efavirenz for HIV. *New Eng J Med*. 2006;354(3):251–60.
71. Af Geijerstam J-L, Oredsson S, Britton M, OCTOPUS Study Investigators. Medical outcome after immediate computed tomography or admission for observation in patients with mild head injury: randomised controlled trial. *Brit Med J*. 2006;333(7566):465–8.

72. Heijnen EMEW, Eijkemans MJC, Klerk C, Polinder S, Beckers NGM, Klinkert ER, et al. A mild treatment strategy for in-vitro fertilisation: a randomised non-inferiority trial. *Lancet*. 2007;369(9563):743–9.
73. Holmes DR, Reddy VY, Turi ZG, Doshi SK, Sievert H, Buchbinder M, et al. Percutaneous closure of the left atrial appendage versus warfarin therapy for prevention of stroke in patients with atrial fibrillation: a randomised non-inferiority trial. *Lancet*. 2009;374(9689):534–42.
74. Home PD, Pocock SJ, Beck-Nielsen H, Curtis PS, Gomis R, Hanefeld M, et al. Rosiglitazone evaluated for cardiovascular outcomes in oral agent combination therapy for type 2 diabetes (RECORD): a multicentre, randomised, open-label trial. *Lancet*. 2009;373(9681):2125–35.
75. Kim ES, Hirsh V, Mok T, Socinski MA, Gervais R, Wu Y-L, et al. Gefitinib versus docetaxel in previously treated non-small-cell lung cancer (INTEREST): a randomised phase III trial. *Lancet*. 2008;372(9652):1809–18.
76. Eron JJ, Yeni P, Gathe JJ, Estrada V, DeJesus E, Staszewski S, et al. The KLEAN study of fosamprenavir-ritonavir versus lopinavir-ritonavir, each in combination with abacavir-lamivudine, for initial treatment of HIV infection over 48 weeks: a randomised non-inferiority trial. *Lancet*. 2006;368(9534):476–82.
77. Koek MBG, Buskens E, Van Weelden H, Steegmans PHA, Bruijnzeel-Koomen CAFM, Sigurdsson V. Home versus outpatient ultraviolet B phototherapy for mild to severe psoriasis: pragmatic multicentre randomised controlled non-inferiority trial (PLUTO study). *Brit Med J*. 2009;338.
78. Kullberg BJ, Sobel JD, Ruhnke M, Pappas PG, Viscoli C, Rex JH, et al. Voriconazole versus a regimen of amphotericin B followed by fluconazole for candidaemia in non-neutropenic patients: a randomised non-inferiority trial. *Lancet*. 2005;366(9495):1435–42.
79. Lennox JL, DeJesus E, Lazzarin A, Pollard RB, Ramalho Madruga JV, Berger DS, et al. Safety and efficacy of raltegravir-based versus efavirenz-based combination therapy in treatment-naïve patients with HIV-1 infection: a multicentre, double-blind randomised controlled trial. *Lancet*. 2009;374(9692):796–806.

80. Lovell K, Cox D, Haddock G, Jones C, Raines D, Garvey R, et al. Telephone administered cognitive behaviour therapy for treatment of obsessive compulsive disorder: randomised controlled non-inferiority trial. *Brit Med J*. 2006;333(7574):883–6.
81. Levin NW, Fishbane S, Valdes Canedo F, Zeig S, Nassar GM, Moran JE, et al. Intravenous methoxy polyethylene glycol-epoetin beta for haemoglobin control in patients with chronic kidney disease who are on dialysis: a randomised non-inferiority trial (MAXIMA). *Lancet*. 2007;370(9596):1415–21.
82. Madruga JV, Berger D, McMurchie M, Suter F, Banhegyi D, Ruxrungtham K, et al. Efficacy and safety of darunavir-ritonavir compared with that of lopinavir-ritonavir at 48 weeks in treatment-experienced, HIV-infected patients in TITAN: a randomised controlled phase III trial. *Lancet*. 2007;370(9581):49–58.
83. Marson AG, Al-Kharusi AM, Alwaidh M, Appleton R, Baker GA, Chadwick DW, et al. The SANAD study of effectiveness of carbamazepine, gabapentin, lamotrigine, oxcarbazepine, or topiramate for treatment of partial epilepsy: an unblinded randomised controlled trial. *Lancet*. 2007;369(9566):1000–15.
84. Moffett JAK, Jackson DA, Richmond S, Hahn S, Coulton S, Farrin A, et al. Randomised trial of a brief physiotherapy intervention compared with usual physiotherapy for neck pain patients: outcomes and patients' preference. *Brit Med J*. 2005;330(7482):75–78A.
85. Montini G, Toffolo A, Zucchetta P, Dall'Amico R, Gobber D, Calderan A, et al. Antibiotic treatment for pyelonephritis in children: multicentre randomised controlled non-inferiority trial. *Brit Med J*. 2007;335(7616):386–388A.
86. Molina J-M, Andrade-Villanueva J, Echevarria J, Chetchotisakd P, Corral J, David N, et al. Once-daily atazanavir/ritonavir versus twice-daily lopinavir/ritonavir, each in combination with tenofovir and emtricitabine, for management of antiretroviral-naïve HIV-1-infected patients: 48 week efficacy and safety results of the CASTLE study. *Lancet*. 2008;372(9639):646–55.

87. El Moussaoui R, Borgie C, Van den Broek P, Hustinx WN, Bresser P, Van den Berk GEL, et al. Effectiveness of discontinuing antibiotic treatment after three days versus eight days in mild to moderate-severe community acquired pneumonia: randomised, double blind study. *Brit Med J*. 2006;332(7554):1355–8.
88. Nathan N, Borel T, Djibo A, Evans D, Djibo S, Corty JF, et al. Ceftriaxone as effective as long-acting chloramphenicol in short-course treatment of meningococcal meningitis during epidemics: a randomised non-inferiority study. *Lancet*. 2005;366(9482):308–13.
89. Oliver RTD, Mason MD, Mead GM, Maase H, Rustin GJS, Joffe JK, et al. Radiotherapy versus single-dose carboplatin in adjuvant treatment of stage I seminoma: a randomised trial. *Lancet*. 2005;366(9482):293–300.
90. Priotto G, Kasparion S, Mutombo W, Ngouama D, Ghorashian S, Arnold U, et al. Nifurtimox-eflornithine combination therapy for second-stage African *Trypanosoma brucei gambiense* trypanosomiasis: a multicentre, randomised, phase III, non-inferiority trial. *Lancet*. 2009;374(9683):56–64.
91. Reboli AC, Rotstein C, Pappas PG, Chapman SW, Kett DH, Kumar D, et al. Anidulafungin versus fluconazole for invasive candidiasis. *New Eng J Med*. 2007;356(24):2472–82.
92. Reid DM, Devogelaer J-P, Saag K, Roux C, Lau C-S, Reginster J-Y, et al. Zoledronic acid and risedronate in the prevention and treatment of glucocorticoid-induced osteoporosis (HORIZON): a multicentre, double-blind, double-dummy, randomised controlled trial. *Lancet*. 2009;373(9671):1253–63.
93. Sacco RL, Diener H-C, Yusuf S, Cotton D, Ounpuu S, Lawton WA, et al. Aspirin and extended-release dipyridamole versus clopidogrel for recurrent stroke. *New Eng J Med*. 2008;359(12):1238–51.
94. Seymour MT, Maughan TS, Ledermann JA, Topham C, James R, Gwyther SJ, et al. Different strategies of sequential and combination chemotherapy for patients with poor prognosis advanced colorectal cancer (MRC FOCUS): a randomised controlled trial. *Lancet*. 2007;370(9582):143–52.

95. Ringleb PA, Allenberg J, Berger J, Brueckmann H, Eckstein H-H, Fraedrich G, et al. 30 day results from the SPACE trial of stent-protected angioplasty versus carotid endarterectomy in symptomatic patients: a randomised non-inferiority trial. *Lancet*. 2006;368(9543):1239–47.
96. Zongo I, Dorsey G, Rouamba N, Tinto H, Dokomajilar C, T Guiguemde R, et al. Artemether-lumefantrine versus amodiaquine plus sulfadoxine-pyrimethamine for uncomplicated falciparum malaria in Burkina Faso: a randomised non-inferiority trial. *Lancet*. 2007;369(9560):491–8.
97. Windecker S, Serruys PW, Wandel S, Buszman P, Trznadel S, Linke A, et al. Biolimus-eluting stent with biodegradable polymer versus sirolimus-eluting stent with durable polymer for coronary revascularisation (LEADERS): a randomised non-inferiority trial. *Lancet*. 2008;372(9644):1163–73.
98. Turpie AGG, Lassen MR, Davidson BL, Bauer KA, Gent M, Kwong LM, et al. Rivaroxaban versus enoxaparin for thromboprophylaxis after total knee arthroplasty (RECORD4): a randomised trial. *Lancet*. 2009;373(9676):1673–80.
99. Szegedi A, Kohnen R, Dienel A, Kieser M. Acute treatment of moderate to severe depression with hypericum extract WS 5570 (St John's wort): randomised controlled double blind non-inferiority trial versus paroxetine. *Brit Med J*. 2005;330(7490):503–6.
100. Petri M, Kim MY, Kalunian KC, Grossman J, Hahn BH, Sammaritano LR, et al. Combined oral contraceptives in women with systemic lupus erythematosus. *New Eng J Med*. 2005;353(24):2550–8.
101. Vincenti F, Larsen C, Durrbach A, Wekerle T, Nashan B, Blanche G, et al. Costimulation blockade with belatacept in renal transplantation. *New Eng J Med*. 2005;353(8):770–81.
102. Dibra A, Kastrati A, Mehilli J, Pache J, Schuhen H, Beckerath N, et al. Paclitaxel-eluting or sirolimus-eluting stents to prevent restenosis in diabetic patients. *New Eng J Med*. 2005;353(7):663–70.
103. Twelves C, Wong A, Nowacki MP, Abt M, Burris H, Carrato A, et al. Capecitabine as adjuvant treatment for stage III colon cancer. *New Eng J Med*. 2005;352(26):2696–704.

104. Lassen MR, Raskob GE, Gallus A, Pineo G, Chen D, Portman RJ, et al. Apixaban or Enoxaparin for Thromboprophylaxis after Knee Replacement. *New Eng J Med*. 2009;361(6):594–604.
105. Loeb M, Dafoe N, Mahony J, John M, Sarabia A, Glavin V, et al. Surgical Mask vs N95 Respirator for Preventing Influenza Among Health Care Workers A Randomized Trial. *J Am Med Assoc*. 2009;302(17):1865–71.
106. Mok TS, Wu Y-L, Thongprasert S, Yang C-H, Chu D-T, Saijo N, et al. Gefitinib or Carboplatin-Paclitaxel in Pulmonary Adenocarcinoma. *New Eng J Med*. 2009;361(10):947–57.
107. Lai C-L, Gane E, Liaw Y-F, Hsu C-W, Thongsawat S, Wang Y, et al. Telbivudine versus lamivudine in patients with chronic hepatitis B. *New Eng J Med*. 2007;357(25):2576–88.
108. Serruys PW, Morice M-C, Kappetein AP, Colombo A, Holmes DR, Mack MJ, et al. Percutaneous Coronary Intervention versus Coronary-Artery Bypass Grafting for Severe Coronary Artery Disease. *New Eng J Med*. 2009;360(10):961–72.
109. Kearon C, Ginsberg JS, Julian JA, Douketis J, Solymoss S, Ockelford P, et al. Comparison of fixed-dose weight-adjusted unfractionated heparin and low-molecular-weight heparin for acute treatment of venous thromboembolism. *J Am Med Assoc*. 2006;296(8):935–42.
110. Anderson DR, Kahn SR, Rodger MA, Kovacs MJ, Morris T, Hirsch A, et al. Computed tomographic pulmonary angiography vs ventilation-perfusion lung scanning in patients with suspected pulmonary embolism - A Randomized controlled trial. *J Am Med Assoc*. 2007;298(23):2743–53.
111. Timsit J-F, Schwebel C, Bouadma L, Geffroy A, Garrouste-Orgeas M, Pease S, et al. Chlorhexidine-Impregnated Sponges and Less Frequent Dressing Changes for Prevention of Catheter-Related Infections in Critically Ill Adults A Randomized Controlled Trial. *J Am Med Assoc*. 2009;301(12):1231–41.

112. Schuetz P, Christ-Crain M, Thomann R, Falconnier C, Wolbers M, Widmer I, et al. Effect of Procalcitonin-Based Guidelines vs Standard Guidelines on Antibiotic Use in Lower Respiratory Tract Infections The ProHOSP Randomized Controlled Trial. *J Am Med Assoc.* 2009;302(10):1059–66.
113. Stone GW, Midei M, Newman W, Sanz M, Hermiller JB, Williams J, et al. Comparison of an everolimus-eluting stent and a paclitaxel-eluting stent in patients with coronary artery disease - A randomized trial. *J Am Med Assoc.* 2008;299(16):1903–13.
114. Konstam MA, Gheorghiade M, Burnett JJC, Grinfeld L, Maggioni AP, Swedberg K, et al. Effects of oral tolvaptan in patients hospitalized for worsening heart failure - The EVEREST outcome trial. *J Am Med Assoc.* 2007;297(12):1319–31.
115. Valgimigli M, Campo G, Percoco G, Bolognese L, Vassanelli C, Colangelo S, et al. Comparison of angioplasty with infusion of tirofiban or abciximab and with implantation of sirolimus-eluting or uncoated stents for acute myocardial infarction - The MULTISTRATEGY randomized trial. *J Am Med Assoc.* 2008;299(15):1788–99.
116. Albers GW, Diener HC, Frison L, Grind M, Nevinson M, Partridge S, et al. Ximelagatran vs warfarin for stroke prevention in patients with nonvalvular atrial fibrillation - A Randomized trial. *J Am Med Assoc.* 2005;293(6):690–8.
117. Fiessinger JN, Huisman MV, Davidson BL, Bounameaux H, Francis CW, Eriksson H, et al. Ximelagatran vs low-molecular-weight heparin and warfarin for the treatment of deep vein thrombosis - A randomized trial. *J Am Med Assoc.* 2005;293(6):681–9.
118. Olanow CW, Rascol O, Hauser R, Feigin PD, Jankovic J, Lang A, et al. A Double-Blind, Delayed-Start Trial of Rasagiline in Parkinson's Disease. *New Eng J Med.* 2009;361(13):1268–78.
119. Perilongo G, Maibach R, Shafford E, Brugieres L, Brock P, Morland B, et al. Cisplatin versus Cisplatin plus Doxorubicin for Standard-Risk Hepatoblastoma. *New Eng J Med.* 2009;361(17):1662–70.

120. Schulman S, Kearon C, Kakkar AK, Mismetti P, Schellong S, Eriksson H, et al. Dabigatran versus Warfarin in the Treatment of Acute Venous Thromboembolism. *New Eng J Med*. 2009;361(24):2342–52.
121. Lacroix J, Hebert PC, Hutchison JS, Hume HA, Tucci M, Ducruet T, et al. Transfusion strategies for patients in pediatric intensive care units. *New Eng J Med*. 2007;356(16):1609–19.
122. Ginzler EM, Dooley MA, Aranow C, Kim MY, Buyon J, Merrill JT, et al. Mycophenolate mofetil or intravenous cyclophosphamide for lupus nephritis. *New Eng J Med*. 2005;353(21):2219–28.
123. Mas J-L, Chatellier G, Beyssen B, Branchereau A, Moulin T, Becquemin J-P, et al. Endarterectomy versus stenting in patients with symptomatic severe carotid stenosis. *New Eng J Med*. 2006;355(16):1660–71.
124. Sundar S, Jha TK, Thakur CP, Sinha PK, Bhattacharya SK, Nguyen B, et al. Injectable paromomycin for visceral leishmaniasis in India. *New Eng J Med*. 2007;356(25):2571–81.
125. Shiffman ML, Suter F, Bacon BR, Nelson D, Harley H, Sola R, et al. Peginterferon alfa-2a and ribavirin for 16 or 24 weeks in HCV genotype 2 or 3. *New Eng J Med*. 2007;357(2):124–34.
126. Buller HR, Cohen AT, Davidson B, Decousus H, Gallus AS, Gent M, et al. Idraparinux versus standard therapy for venous thromboembolic disease. *New Eng J Med*. 2007;357(11):1094–104.
127. Bolla M, Reijke TM, Van Tienhoven G, Van den Bergh ACM, Oddens J, Poortmans PMP, et al. Duration of Androgen Suppression in the Treatment of Prostate Cancer. *New Eng J Med*. 2009;360(24):2516–27.
128. Muss HB, Berry DA, Cirincione CT, Theodoulou M, Mauer AM, Kornblith AB, et al. Adjuvant Chemotherapy in Older Women with Early-Stage Breast Cancer. *New Eng J Med*. 2009;360(20):2055–65.
129. Blomberg J, Lagergren P, Martin L, Mattsson F, Lagergren J. Novel approach to antibiotic prophylaxis in percutaneous endoscopic gastrostomy (PEG): randomised controlled trial. *Brit Med J*. 2010;341.

130. Lund SS, Tarnow L, Frandsen M, Nielsen BB, Hansen BV, Pedersen O, et al. Combining insulin with metformin or an insulin secretagogue in non-obese patients with type 2 diabetes: 12 month, randomised, double blind trial. *Brit Med J* [Internet]. 2009 [cited 2013 Jan 10];339. Available from: <http://www.ncbi.nlm.nih.gov/pmc/articles/PMC2775102/>
131. Giuliano AE, Hunt KK, Ballman KV, Beitsch PD, Whitworth PW, Blumencranz PW, et al. Axillary Dissection vs No Axillary Dissection in Women With Invasive Breast Cancer and Sentinel Node Metastasis A Randomized Clinical Trial. *J Am Med Assoc*. 2011;305(6):569–75.
132. Jones AE, Shapiro NI, Trzeciak S, Arnold RC, Claremont HA, Kline JA, et al. Lactate Clearance vs Central Venous Oxygen Saturation as Goals of Early Sepsis Therapy A Randomized Clinical Trial. *J Am Med Assoc*. 2010;303(8):739–46.
133. Rauch SD, Halpin CF, Antonelli PJ, Babu S, Carey JP, Gantz BJ, et al. Oral vs Intratympanic Corticosteroid Therapy for Idiopathic Sudden Sensorineural Hearing Loss A Randomized Trial. *J Am Med Assoc*. 2011;305(20):2071–9.
134. Connolly S, Pogue J, Hart R, Pfeffer M, Hohnloser S, Chrolavicius S, et al. Clopidogrel plus aspirin versus oral anticoagulation for atrial fibrillation in the Atrial fibrillation Clopidogrel Trial with Irbesartan for prevention of Vascular Events (ACTIVE W): a randomised controlled trial. *Lancet*. 2006;367(9526):1903–12.
135. Smith CR, Leon MB, Mack MJ, Miller C, Moses JW, Svensson LG, et al. Transcatheter versus Surgical Aortic-Valve Replacement in High-Risk Patients. *New Eng J Med*. 2011;364(23):2187–98.
136. Sherman KE, Flamm SL, Afdhal NH, Nelson DR, Sulkowski MS, Everson GT, et al. Response-Guided Telaprevir Combination Treatment for Hepatitis C Virus Infection. *New Eng J Med*. 2011;365(11):1014–24.

137. Patel MR, Mahaffey KW, Garg J, Pan G, Singer DE, Hacke W, et al. Rivaroxaban versus Warfarin in Nonvalvular Atrial Fibrillation. *New Eng J Med*. 2011;365(10):883–91.
138. Park S-J, Kim Y-H, Park D-W, Yun S-C, Ahn J-M, Song HG, et al. Randomized Trial of Stents versus Bypass Surgery for Left Main Coronary Artery Disease. *New Eng J Med*. 2011;364(18):1718–27.
139. Martin DF, Maguire MG, Ying G, Grunwald JE, Fine SL, Jaffe GJ, et al. Ranibizumab and Bevacizumab for Neovascular Age-Related Macular Degeneration The CATT Research Group. *New Eng J Med*. 2011;364(20):1897–908.
140. Granger CB, Alexander JH, McMurray JJV, Lopes RD, Hylek EM, Hanna M, et al. Apixaban versus Warfarin in Patients with Atrial Fibrillation. *New Eng J Med*. 2011;365(11):981–92.
141. Vergote I, Trope CG, Amant F, Kristensen GB, Ehlen T, Johnson N, et al. Neoadjuvant Chemotherapy or Primary Surgery in Stage IIIC or IV Ovarian Cancer. *New Eng J Med*. 2010;363(10):943–53.
142. Whelan TJ, Pignol J-P, Levine MN, Julian JA, MacKenzie R, Parpia S, et al. Long-Term Results of Hypofractionated Radiation Therapy for Breast Cancer. *New Eng J Med*. 2010;362(6):513–20.
143. Van Gelder IC, Groenveld HF, Crijns HJ, Tuininga YS, Tijssen JG, Alings AM, et al. Lenient versus strict rate control in patients with atrial fibrillation. *The New England journal of medicine*. 2010 Apr 15;362:1363–73.
144. Bauersachs R, Berkowitz SD, Brenner B, Buller HR, Decousus H, Gallus AS, et al. Oral Rivaroxaban for Symptomatic Venous Thromboembolism. *New Eng J Med*. 2010;363(26):2499–510.
145. Sterling TR, Villarino ME, Borisov AS, Shang N, Gordin F, Bliven-Sizemore E, et al. Three Months of Rifapentine and Isoniazid for Latent Tuberculosis Infection. *New Eng J Med*. 2011;365(23):2155–66.
146. Sundar S, Chakravarty J, Agarwal D, Rai M, Murray HW. Single-Dose Liposomal Amphotericin B for Visceral Leishmaniasis in India. *New Eng J Med*. 2010;362(6):504–12.

147. Stone GW, Rizvi A, Newman W, Mastali K, Wang JC, Caputo R, et al. Everolimus-Eluting versus Paclitaxel-Eluting Stents in Coronary Artery Disease. *New Eng J Med*. 2010;362(18):1663–74.
148. Stone JH, Merkel PA, Spiera R, Seo P, Langford CA, Hoffman GS, et al. Rituximab versus Cyclophosphamide for ANCA-Associated Vasculitis. *New Eng J Med*. 2010;363(3):221–32.
149. Lassen MR, Gallus A, Raskob GE, Pineo G, Chen D, Ramirez LM, et al. Apixaban versus Enoxaparin for Thromboprophylaxis after Hip Replacement. *New Eng J Med*. 2010;363(26):2487–98.
150. Serruys PW, Silber S, Garg S, Van Geuns RJ, Richardt G, Buszman PE, et al. Comparison of Zotarolimus-Eluting and Everolimus-Eluting Coronary Stents. *New Eng J Med*. 2010;363(2):136–46.
151. Pham MX, Teuteberg JJ, Kfoury AG, Starling RC, Deng MC, Cappola TP, et al. Gene-Expression Profiling for Rejection Surveillance after Cardiac Transplantation. *New Eng J Med*. 2010;362(20):1890–900.
152. Cohen CJ, Andrade-Villanueva J, Clotet B, Fourie J, Johnson MA, Ruxrungtham K, et al. Rilpivirine versus efavirenz with two background nucleoside or nucleotide reverse transcriptase inhibitors in treatment-naïve adults infected with HIV-1 (THRIVE): a phase 3, randomised, non-inferiority trial. *Lancet*. 2011;378(9787):229–37.
153. Fizazi K, Carducci M, Smith M, Damiao R, Brown J, Karsh L, et al. Denosumab versus zoledronic acid for treatment of bone metastases in men with castration-resistant prostate cancer: a randomised, double-blind study. *Lancet*. 2011;377(9768):813–22.
154. Vons C, Barry C, Maitre S, Pautrat K, Leconte M, Costaglioli B, et al. Amoxicillin plus clavulanic acid versus appendicectomy for treatment of acute uncomplicated appendicitis: an open-label, non-inferiority, randomised controlled trial. *Lancet*. 2011;377(9777):1573–9.

155. Sundar S, Sinha PK, Rai M, Verma DK, Nawin K, Alam S, et al. Comparison of short-course multidrug treatment with standard therapy for visceral leishmaniasis in India: an open-label, non-inferiority, randomised controlled trial. *Lancet*. 2011;377(9764):477–86.
156. Molina J-M, Cahn P, Grinsztejn B, Lazzarin A, Mills A, Saag M, et al. Rilpivirine versus efavirenz with tenofovir and emtricitabine in treatment-naïve adults infected with HIV-1 (ECHO): a phase 3 randomised double-blind active-controlled trial. *Lancet*. 2011;378(9787):238–46.
157. Malfertheiner P, Bazzoli F, Delchier J-C, Celinski K, Giguere M, Riviere M, et al. Helicobacter pylori eradication with a capsule containing bismuth subcitrate potassium, metronidazole, and tetracycline given with omeprazole versus clarithromycin-based triple therapy: a randomised, open-label, non-inferiority, phase 3 trial. *Lancet*. 2011;377(9769):905–13.
158. Winikoff B, Dabash R, Durocher J, Darwish E, Ngoc NTN, Leon W, et al. Treatment of post-partum haemorrhage with sublingual misoprostol versus oxytocin in women not exposed to oxytocin during labour: a double-blind, randomised, non-inferiority trial. *Lancet*. 2010;375(9710):210–6.
159. Bousser M-G, Amarenco P, Chamorro A, Fisher M, Ford I, Fox KM, et al. Terutroban versus aspirin in patients with cerebral ischaemic events (PERFORM): a randomised, double-blind, parallel-group trial. *Lancet*. 2011;377(9782):2013–22.
160. Aujesky D, Roy P-M, Verschuren F, Righini M, Osterwalder J, Egloff M, et al. Outpatient versus inpatient treatment for patients with acute pulmonary embolism: an international, open-label, randomised, non-inferiority trial. *Lancet*. 2011;378(9785):41–8.
161. Vaidya JS, Joseph DJ, Tobias JS, Bulsara M, Wenz F, Saunders C, et al. Targeted intraoperative radiotherapy versus whole breast radiotherapy for breast cancer (TARGIT-A trial): an international, prospective, randomised, non-inferiority phase 3 trial. *Lancet*. 2010;376(9735):91–102.

162. Tshefu AK, Gaye O, Kayentao K, Thompson R, Bhatt KM, Sesay SSS, et al. Efficacy and safety of a fixed-dose oral combination of pyronaridine-artesunate compared with artemether-lumefantrine in children and adults with uncomplicated *Plasmodium falciparum* malaria: a randomised non-inferiority trial. *Lancet*. 2010;375(9724):1457–67.
163. Sanne I, Orrell C, Fox MP, Conradie F, Ive P, Zeinecker J, et al. Nurse versus doctor management of HIV-infected patients receiving antiretroviral therapy (CIPRA-SA): a randomised non-inferiority trial. *Lancet*. 2010;376(9734):33–40.
164. Rosenstock J, Lorber DL, Gnudi L, Howard CP, Bilheimer DW, Chang P-C, et al. Prandial inhaled insulin plus basal insulin glargine versus twice daily biphasic insulin for type 2 diabetes: a multicentre randomised trial. *Lancet*. 2010;375(9733):2244–53.
165. Pratley RE, Nauck M, Bailey T, Montanya E, Cuddihy R, Filetti S, et al. Liraglutide versus sitagliptin for patients with type 2 diabetes who did not have adequate glycaemic control with metformin: a 26-week, randomised, parallel-group, open-label trial. *Lancet*. 2010;375(9724):1447–56.
166. Nout RA, Smit VTHBM, Putter H, Juergenliemk-Schulz IM, Jobsen JJ, Lutgens LCHW, et al. Vaginal brachytherapy versus pelvic external beam radiotherapy for patients with endometrial cancer of high-intermediate risk (PORTEC-2): an open-label, non-inferiority, randomised trial. *Lancet*. 2010;375(9717):816–23.
167. Mugenyi P, Walker AS, Hakim J, Munderi P, Gibb DM, Kityo C, et al. Routine versus clinically driven laboratory monitoring of HIV antiretroviral therapy in Africa (DART): a randomised non-inferiority trial. *Lancet*. 2010;375(9709):123–31.
168. Lassen MR, Raskob GE, Gallus A, Pineo G, Chen D, Hornick P, et al. Apixaban versus enoxaparin for thromboprophylaxis after knee replacement (ADVANCE-2): a randomised double-blind trial. *Lancet*. 2010;375(9717):807–15.

169. Glasier AF, Cameron ST, Fine PM, Logan SJS, Casale W, Van Horn J, et al. Ulipristal acetate versus levonorgestrel for emergency contraception: a randomised non-inferiority trial and meta-analysis. *Lancet*. 2010;375(9714):555–62.
170. Eron JJ, Young B, Cooper DA, Youle M, DeJesus E, Andrade-Villanueva J, et al. Switch to a raltegravir-based regimen versus continuation of a lopinavir-ritonavir-based regimen in stable HIV-infected patients with suppressed viraemia (SWITCHMRK 1 and 2): two multicentre, double-blind, randomised controlled trials. *Lancet*. 2010;375(9712):396–407.
171. Bouadma L, Luyt C-E, Tubach F, Cracco C, Alvarez A, Schwebel C, et al. Use of procalcitonin to reduce patients' exposure to antibiotics in intensive care units (PRORATA trial): a multicentre randomised controlled trial. *Lancet*. 2010;375(9713):463–74.
172. Lienhardt C, Cook SV, Burgos M, Yorke-Edwards V, Rigouts L, Anyo G, et al. Efficacy and Safety of a 4-Drug Fixed-Dose Combination Regimen Compared With Separate Drugs for Treatment of Pulmonary Tuberculosis The Study C Randomized Controlled Trial. *J Am Med Assoc*. 2011;305(14):1415–23.
173. Blum J, Winikoff B, Raghavan S, Dabash R, Ramadan MC, Dilbaz B, et al. Treatment of post-partum haemorrhage with sublingual misoprostol versus oxytocin in women receiving prophylactic oxytocin: a double-blind, randomised, non-inferiority trial. *Lancet*. 2010;375(9710):217–23.
174. Riedner G, Rusizoka M, Todd J, Maboko L, Hoelscher M, Mmbando D, et al. Single-Dose Azithromycin versus Penicillin G Benzathine for the Treatment of Early Syphilis. *New Eng J Med*. 2005;353(12):1236–44.
