# Supplementary material
Source: publisher figshare collection journal article supplement (https://plos.figshare.com/articles/dataset/_/1123628)
Supplement: Supplementary file 1 [file 1 › Table_S2.pdf]

Supplementary table 2a: Data used for the estimation of likelihood of harm in the Non-inferiority trials registered either in clinicaltrials.gov / ISRCTN (2000 to 2007) contributing to our analyses (N-62):

| S.No. | Study id | Overall Sample size | Scale of the primary outcome variable | Non-inferiority Margin* | Response rate in the control arm <sup>‡</sup> | Number of events in the control arm <sup>†</sup> |
|-------|----------|---------------------|---------------------------------------|-------------------------|-----------------------------------------------|--------------------------------------------------|
| 1     | NI001    | 164                 | Binary                                | -0.1                    | 0.55                                          |                                                  |
| 2     | NI004    | 466                 | Time to event                         | 0.86                    |                                               | 204                                              |
| 3     | NI006    | 86                  | Continuous                            | -0.61                   |                                               |                                                  |
| 4     | NI008    | 541                 | Continuous                            | -0.56                   |                                               |                                                  |
| 5     | NI011    | 364                 | Continuous                            | -0.47                   |                                               |                                                  |
| 6     | NI023    | 80                  | Continuous                            | -0.51                   |                                               |                                                  |
| 7     | NI024    | 1264                | Binary                                | -0.025                  | 0.96                                          |                                                  |
| 8     | NI031    | 1305                | Binary                                | -0.1                    | 0.80                                          |                                                  |
| 9     | NI034    | 341                 | Continuous                            | -0.54                   |                                               |                                                  |
| 10    | NI038    | 382                 | Continuous                            | -0.35                   |                                               |                                                  |
| 11    | NI039    | 256                 | Binary                                | -0.15                   | 0.81                                          |                                                  |
| 12    | NI0310   | 681                 | Binary                                | -0.1                    | 0.50                                          |                                                  |
| 13    | NI0311   | 20078               | Time to event                         | 0.84                    |                                               | 573                                              |
| 14    | NI0313   | 801                 | Continuous                            | -0.25                   |                                               |                                                  |
| 15    | NI0315   | 1113                | Binary                                | -0.13                   | 0.61                                          |                                                  |
| 16    | NI0318   | 245                 | Binary                                | -0.2                    | 0.70                                          |                                                  |
| 17    | NI0320   | 392                 | Binary                                | -0.15                   | 0.65                                          |                                                  |
| 18    | NI0323   | 2215                | Binary                                | -0.015                  | 0.96                                          |                                                  |
| 19    | NI0324   | 4576                | Time to event                         | 0.67                    |                                               | 27                                               |
| 20    | NI0325   | 380                 | Continuous                            | -0.31                   |                                               |                                                  |
| 21    | NI115    | 472                 | Binary                                | -0.15                   | 0.45                                          |                                                  |
| 22    | NI116    | 235                 | Binary                                | -0.2                    | 0.65                                          |                                                  |
| 23    | NI117    | 876                 | Time to event                         | 0.33                    |                                               | 31                                               |
| 24    | NI1110   | 672                 | Binary                                | -0.125                  | 0.70                                          |                                                  |

|    |        |      |               |        |      |
|----|--------|------|---------------|--------|------|
| 25 | NI1111 | 393  | Binary        | -0.06  | 0.94 |
| 26 | NI1112 | 294  | Continuous    | -0.58  |      |
| 27 | NI1113 | 210  | Binary        | -0.15  | 0.63 |
| 28 | NI1115 | 9215 | Binary        | -0.018 | 0.94 |
| 29 | NI1118 | 872  | Continuous    | -0.25  |      |
| 30 | NI1122 | 60   | Binary        | -0.15  | 0.86 |
| 31 | NI1126 | 827  | Binary        | -0.06  | 0.94 |
| 32 | NI127  | 60   | Binary        | -0.3   | 0.57 |
| 33 | NI129  | 1051 | Continuous    | -0.46  |      |
| 34 | NI1211 | 173  | Continuous    | -0.54  |      |
| 35 | NI1219 | 180  | Binary        | -0.14  | 0.96 |
| 36 | NI1222 | 1276 | Binary        | -0.015 | 0.99 |
| 37 | NI1223 | 167  | Continuous    | -0.25  |      |
| 38 | NI1230 | 176  | Continuous    | -0.26  |      |
| 39 | NI1235 | 758  | Binary        | -0.13  | 0.64 |
| 40 | NI1239 | 422  | Binary        | -0.15  | 0.70 |
| 41 | NI1240 | 603  | Binary        | -0.2   | 0.93 |
| 42 | NI1246 | 304  | Binary        | -0.12  | 0.93 |
| 43 | NI1254 | 134  | Continuous    | -0.49  |      |
| 44 | NI1255 | 340  | Binary        | -0.1   | 0.78 |
| 45 | NI1256 | 283  | Continuous    | -0.54  |      |
| 46 | NI1259 | 517  | Continuous    | -0.24  |      |
| 47 | NI1260 | 43   | Binary        | -0.2   | 0.37 |
| 48 | NI1263 | 938  | Continuous    | -0.18  |      |
| 49 | NI1265 | 110  | Binary        | -0.15  | 0.82 |
| 50 | NI1270 | 353  | Binary        | -0.1   | 0.60 |
| 51 | NI1278 | 238  | Continuous    | -0.67  |      |
| 52 | NI1301 | 79   | Continuous    | -0.50  |      |
| 53 | NI1302 | 964  | Time to event | 0.81   | 438  |

|    |        |      |               |        |      |
|----|--------|------|---------------|--------|------|
| 54 | NI1303 | 86   | Continuous    | -0.58  |      |
| 55 | NI1305 | 1148 | Binary        | -0.005 | 0.92 |
| 56 | NI1312 | 255  | Continuous    | -0.70  |      |
| 57 | NI1315 | 159  | Time to event | 0.91   | 30   |
| 58 | NI1317 | 652  | Binary        | -0.1   | 0.95 |
| 59 | NI1318 | 2962 | Binary        | -0.03  | 0.95 |
| 60 | NI1319 | 1232 | Binary        | -0.1   | 0.93 |
| 61 | NI1320 | 682  | Binary        | -0.05  | 0.95 |
| 62 | NI1321 | 619  | Binary        | -0.1   | 0.47 |

\*non-inferiority margin expressed based on the scale of the primary outcome in the trial - as risk difference for binary, Cohen's d for continuous and hazard ratio for time to event outcomes

‡ used in trials where the primary outcome is binary

† used in trials where the primary outcome is time to event

Supplementary table 2b: Data used for the estimation of likelihood of harm in the Non-inferiority trials published in the four major journals (2005 to 2011) contributing to our analyses (N-112):

| S.No. | Study id | Overall Sample size | Scale of the primary outcome variable | Non-inferiority Margin* | Treatment effect in the control arm <sup>‡</sup> | Number of events in the control arm <sup>†</sup> |
|-------|----------|---------------------|---------------------------------------|-------------------------|--------------------------------------------------|--------------------------------------------------|
| 1     | MJ001    | 812                 | Binary                                | -0.05                   | 0.95                                             |                                                  |
| 2     | MJ002    | 412                 | Continuous                            | -0.40                   |                                                  |                                                  |
| 3     | MJ003    | 464                 | Continuous                            | -0.33                   |                                                  |                                                  |
| 4     | MJ004    | 18113               | Binary                                | -0.0077                 | 0.98                                             |                                                  |
| 5     | MJ005    | 1354                | Binary                                | -0.03                   | 0.95                                             |                                                  |
| 6     | MJ007    | 295                 | Continuous                            | -0.33                   |                                                  |                                                  |
| 7     | MJ008    | 2651                | Binary                                | -0.077                  | 0.80                                             |                                                  |
| 8     | MJ009    | 487                 | Binary                                | -0.13                   | 0.73                                             |                                                  |
| 9     | MJ010    | 2525                | Binary                                | -0.05                   | 0.75                                             |                                                  |
| 10    | MJ011    | 404                 | Binary                                | -0.125                  | 0.45                                             |                                                  |
| 11    | MJ012    | 707                 | Time to event                         | 0.50                    |                                                  | 18                                               |
| 12    | MJ013    | 4447                | Time to event                         | 0.83                    |                                                  | 323                                              |
| 13    | MJ014    | 1433                | Time to event                         | 0.87                    |                                                  | 576                                              |
| 14    | MJ015    | 838                 | Binary                                | -0.12                   | 0.70                                             |                                                  |
| 15    | MJ016    | 185                 | Binary                                | -0.15                   | 0.85                                             |                                                  |
| 16    | MJ017    | 370                 | Binary                                | -0.15                   | 0.65                                             |                                                  |
| 17    | MJ019    | 521                 | Binary                                | -0.12                   | 0.75                                             |                                                  |
| 18    | MJ020    | 72                  | Continuous                            | -0.58                   |                                                  |                                                  |
| 19    | MJ021    | 540                 | Continuous                            | -0.61                   |                                                  |                                                  |
| 20    | MJ022    | 419                 | Binary                                | -0.12                   | 0.68                                             |                                                  |
| 21    | MJ023    | 1609                | Binary                                | -0.1                    | 0.70                                             |                                                  |
| 22    | MJ024    | 221                 | Continuous                            | -0.12                   |                                                  |                                                  |
| 23    | MJ025    | 400                 | Binary                                | -0.1                    | 0.85                                             |                                                  |
| 24    | MJ026    | 883                 | Binary                                | -0.1                    | 0.70                                             |                                                  |

|    |       |       |               |        |      |     |
|----|-------|-------|---------------|--------|------|-----|
| 25 | MJ027 | 114   | Binary        | -0.1   | 0.93 |     |
| 26 | MJ028 | 308   | Binary        | -0.1   | 0.85 |     |
| 27 | MJ029 | 1477  | Binary        | -0.03  | 0.96 |     |
| 28 | MJ030 | 286   | Binary        | -0.1   | 0.93 |     |
| 29 | MJ031 | 245   | Binary        | -0.2   | 0.70 |     |
| 30 | MJ032 | 771   | Continuous    | -0.12  |      |     |
| 31 | MJ034 | 20332 | Time to event | 0.93   |      | 898 |
| 32 | MJ035 | 2135  | Time to event | 0.85   |      | 606 |
| 33 | MJ036 | 1183  | Binary        | -0.025 | 0.95 |     |
| 34 | MJ037 | 748   | Binary        | -0.03  | 0.96 |     |
| 35 | MJ038 | 1707  | Binary        | -0.04  | 0.92 |     |
| 36 | MJ039 | 1742  | Binary        | -0.04  | 0.73 |     |
| 37 | MJ042 | 244   | Continuous    | -0.29  |      |     |
| 38 | MJ043 | 183   | Binary        | -0.09  | 0.94 |     |
| 39 | MJ044 | 140   | Binary        | -0.2   | 0.85 |     |
| 40 | MJ045 | 205   | Continuous    | -0.36  |      |     |
| 41 | MJ046 | 1987  | Time to event | 0.80   |      | 380 |
| 42 | MJ047 | 3195  | Binary        | -0.056 | 0.84 |     |
| 43 | MJ048 | 422   | Binary        | -0.09  | 0.80 |     |
| 44 | MJ049 | 1217  | Time to event | 0.83   |      | 497 |
| 45 | MJ050 | 1373  | Binary        | -0.15  | 0.67 |     |
| 46 | MJ053 | 1740  | Binary        | -0.066 | 0.88 |     |
| 47 | MJ054 | 697   | Binary        | -0.05  | 0.94 |     |
| 48 | MJ055 | 1406  | Binary        | -0.025 | 0.84 |     |
| 49 | MJ057 | 1636  | Binary        | -0.03  | 0.88 |     |
| 50 | MJ058 | 1359  | Binary        | -0.075 | 0.80 |     |
| 51 | MJ060 | 1001  | Continuous    | -0.42  |      |     |
| 52 | MJ061 | 1080  | Binary        | -0.065 | 0.74 |     |
| 53 | MJ062 | 745   | Binary        | -0.105 | 0.85 |     |

|    |       |       |               |        |      |     |
|----|-------|-------|---------------|--------|------|-----|
| 54 | MJ063 | 6405  | Binary        | -0.02  | 0.96 |     |
| 55 | MJ064 | 2489  | Binary        | -0.04  | 0.96 |     |
| 56 | MJ065 | 910   | Continuous    | -0.35  |      |     |
| 57 | MJ066 | 235   | Binary        | -0.1   | 0.93 |     |
| 58 | MJ067 | 2539  | Binary        | -0.036 | 0.98 |     |
| 59 | MJ068 | 637   | Binary        | -0.1   | 0.88 |     |
| 60 | MJ069 | 140   | Binary        | -0.1   | 0.60 |     |
| 61 | MJ072 | 520   | Binary        | -0.02  | 0.94 |     |
| 62 | MJ074 | 666   | Binary        | -0.1   | 0.99 |     |
| 63 | MJ075 | 1319  | Binary        | -0.063 | 0.80 |     |
| 64 | MJ076 | 2215  | Binary        | -0.037 | 0.96 |     |
| 65 | MJ078 | 230   | Time to event | 0.74   |      | 98  |
| 66 | MJ079 | 633   | Time to event | 0.80   |      | 291 |
| 67 | MJ081 | 234   | Binary        | -0.15  | 0.80 |     |
| 68 | MJ082 | 101   | Continuous    | -0.63  |      |     |
| 69 | MJ083 | 856   | Time to event | 0.77   |      | 52  |
| 70 | MJ084 | 300   | Binary        | -0.1   | 0.75 |     |
| 71 | MJ085 | 250   | Continuous    | -0.46  |      |     |
| 72 | MJ086 | 3335  | Time to event | 0.84   |      | 165 |
| 73 | MJ087 | 699   | Binary        | -0.075 | 0.68 |     |
| 74 | MJ088 | 321   | Binary        | -0.105 | 0.90 |     |
| 75 | MJ089 | 14264 | Time to event | 0.68   |      | 241 |
| 76 | MJ090 | 600   | Binary        | -0.07  | 0.87 |     |
| 77 | MJ091 | 549   | Continuous    | -0.38  |      |     |
| 78 | MJ092 | 18201 | Binary        | -0.006 | 0.98 |     |
| 79 | MJ094 | 670   | Time to event | 0.80   |      | 230 |
| 80 | MJ095 | 1234  | Binary        | -0.05  | 0.93 |     |
| 81 | MJ096 | 614   | Binary        | -0.1   | 0.75 |     |
| 82 | MJ098 | 3449  | Time to event | 0.50   |      | 51  |

|     |       |       |               |         |      |      |
|-----|-------|-------|---------------|---------|------|------|
| 83  | MJ099 | 5858  | Binary        | -0.0075 | 0.99 |      |
| 84  | MJ100 | 412   | Binary        | -0.0008 | 0.99 |      |
| 85  | MJ101 | 3687  | Binary        | -0.031  | 0.92 |      |
| 86  | MJ102 | 197   | Binary        | -0.2    | 0.30 |      |
| 87  | MJ103 | 3866  | Binary        | -0.014  | 0.94 |      |
| 88  | MJ104 | 2245  | Binary        | -0.035  | 0.92 |      |
| 89  | MJ105 | 602   | Binary        | -0.021  | 0.95 |      |
| 90  | MJ106 | 678   | Binary        | -0.12   | 0.75 |      |
| 91  | MJ107 | 950   | Time to event | 0.90    |      | 384  |
| 92  | MJ108 | 239   | Binary        | -0.1    | 0.98 |      |
| 93  | MJ109 | 316   | Binary        | -0.07   | 0.97 |      |
| 94  | MJ112 | 690   | Binary        | -0.12   | 0.75 |      |
| 95  | MJ113 | 339   | Binary        | -0.1    | 0.80 |      |
| 96  | MJ114 | 978   | Binary        | -0.06   | 0.88 |      |
| 97  | MJ115 | 19100 | Time to event | 0.95    |      | 1062 |
| 98  | MJ116 | 339   | Binary        | -0.04   | 0.99 |      |
| 99  | MJ117 | 2232  | Binary        | -0.025  | 0.94 |      |
| 100 | MJ118 | 1170  | Binary        | -0.05   | 0.93 |      |
| 101 | MJ120 | 812   | Time to event | 0.71    |      | 179  |
| 102 | MJ121 | 448   | Continuous    | -0.38   |      |      |
| 103 | MJ122 | 439   | Continuous    | -0.42   |      |      |
| 104 | MJ123 | 427   | Binary        | -0.06   | 0.98 |      |
| 105 | MJ124 | 3316  | Time to event | 0.85    |      | 356  |
| 106 | MJ125 | 3009  | Binary        | -0.04   | 0.84 |      |
| 107 | MJ126 | 2221  | Binary        | -0.0065 | 0.99 |      |
| 108 | MJ127 | 348   | Binary        | -0.12   | 0.88 |      |
| 109 | MJ128 | 621   | Binary        | -0.1    | 0.65 |      |
| 110 | MJ129 | 1348  | Binary        | -0.04   | 0.91 |      |
| 111 | MJ131 | 809   | Binary        | -0.06   | 0.88 |      |

|     |       |     |        |        |      |
|-----|-------|-----|--------|--------|------|
| 112 | MJ132 | 155 | Binary | -0.075 | 0.95 |
|-----|-------|-----|--------|--------|------|

\*non-inferiority margin expressed based on the scale of the primary outcome in the trial - as risk difference for binary, Cohen's d for continuous and hazard ratio for time to event outcomes

‡ used in trials where the primary outcome is binary

† used in trials where the primary outcome is time to event
