# Supplementary material
Source: publisher figshare collection journal article supplement (https://plos.figshare.com/articles/dataset/_/1123628)
Supplement: Supplementary file 1 [file 1 › Table_S3.pdf]

Table S3: Scenarios of true effect distribution used in the calculation of likelihood of degradation in the sensitivity analyses:

| True effect distribution               | Optimistic scenario |        |       | Moderate scenario |         |         | Pessimistic scenario |        |        |
|----------------------------------------|---------------------|--------|-------|-------------------|---------|---------|----------------------|--------|--------|
| % true treatment effect being positive | 0.5                 |        |       | 0.31              |         |         | 0.16                 |        |        |
| Sensitivity analysis set               | *0.667              | Actual | *1.5  | *0.667            | Actual  | *1.5    | *0.667               | Actual | *1.5   |
| Continuous outcome (Cohen's d)         |                     |        |       |                   |         |         |                      |        |        |
| Average true treatment effect          | 0                   | 0      | 0     | -0.0335           | -0.05   | -0.075  | -0.067               | -0.1   | -0.15  |
| Standard deviation                     | 0.067               | 0.1    | 0.15  | 0.067             | 0.1     | 0.15    | 0.067                | 0.1    | 0.15   |
|                                        |                     |        |       |                   |         |         |                      |        |        |
| Binary outcome (log odds ratio)        |                     |        |       |                   |         |         |                      |        |        |
| Average true treatment effect          | 0                   | 0      | 0     | -0.06801          | -0.1015 | -0.1523 | -0.136               | -0.203 | -0.305 |
| Standard deviation                     | 0.136               | 0.203  | 0.305 | 0.13601           | 0.203   | 0.3045  | 0.13601              | 0.203  | 0.3045 |
| Average true treatment effect as OR    | 1                   | 1      | 1     | 0.93              | 0.90    | 0.86    | 0.87                 | 0.82   | 0.74   |
|                                        |                     |        |       |                   |         |         |                      |        |        |
| Survival outcome (log hazards ratio)   |                     |        |       |                   |         |         |                      |        |        |
| Average true treatment effect          | 0                   | 0      | 0     | -0.04824          | -0.072  | -0.108  | -0.0965              | -0.144 | -0.216 |
| Standard deviation                     | 0.0965              | 0.144  | 0.216 | 0.09648           | 0.144   | 0.216   | 0.09648              | 0.144  | 0.216  |
| Average true treatment effect as HR    | 1                   | 1      | 1     | 0.95              | 0.93    | 0.90    | 0.91                 | 0.87   | 0.81   |
|                                        |                     |        |       |                   |         |         |                      |        |        |
| Median likelihood of degradation       | 0.43                | 0.39   | 0.34  | 0.62              | 0.56    | 0.49    | 0.78                 | 0.72   | 0.65   |
